# Supplementary material for: Discovery of Novel Compounds for Combating Rising Severity of Plant Diseases Caused by Fungi and Viruses
Source: PubMed Central journal article supplement — ACS Omega. 2023 Dec 27;9(1):1424–35. doi: 10.1021/acsomega.3c07820 (PMC10785787; doi:10.1021/acsomega.3c07820), 2023-12-27
Supplement: ao3c07820_si_001.pdf [file ao3c07820_si_001.pdf]

## **Supporting Information**

### **Discovery of Novel Compounds for Combating Rising Severity of Plant Diseases Caused by Fungi and Viruses**

**Nianjuan Pan<sup>1,#</sup>, Hui Wang<sup>1,#</sup>, Jiansong An<sup>1</sup>, Chunyi Liu<sup>1</sup>, Haijiang Chen<sup>1</sup>, Qiang Fei<sup>1</sup>, Pei Li<sup>2,\*</sup>, Wenneng Wu<sup>1,\*</sup>**

<sup>1</sup> School of Food Science and Engineering, Guiyang University, Guiyang, China

<sup>2</sup> Qiandongnan Engineering and Technology Research Center for Comprehensive Utilization of National Medicine, Kaili University, Kaili, China

# These authors contributed equally to this work

\* Correspondence: pl19890627@126.com (Pei Li), wuwenneng123@126.com (Wenneng Wu)

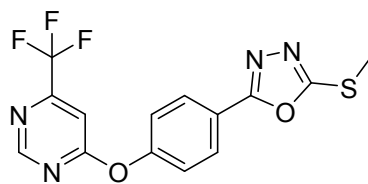

Figure S1. The structure of compound **6a**

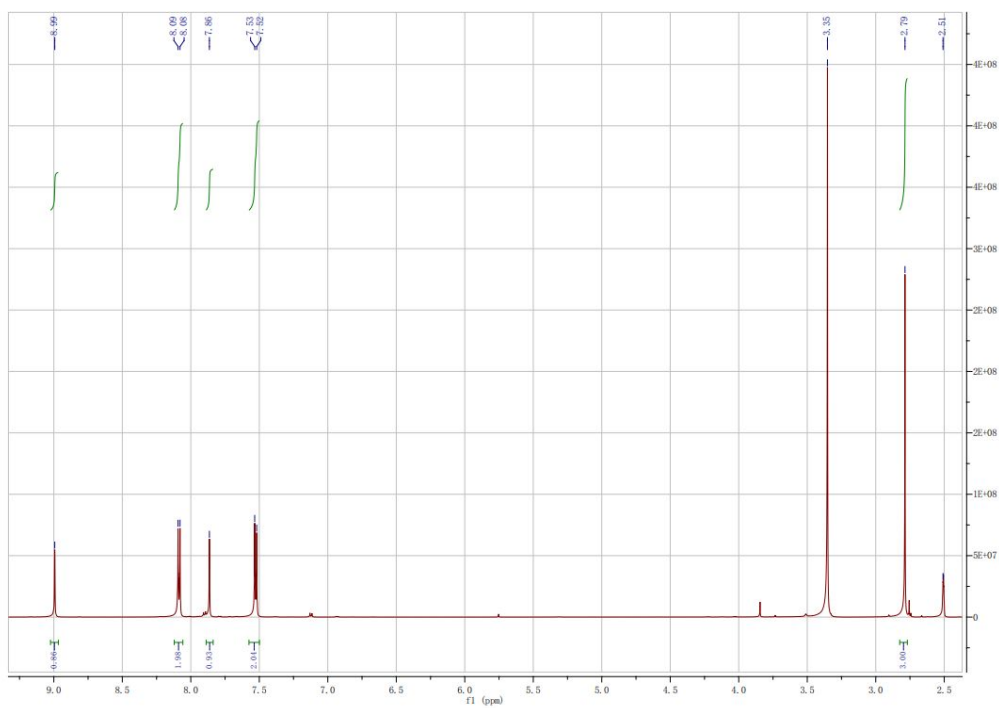

Figure S2. <sup>1</sup>H NMR spectra of compound **6a**

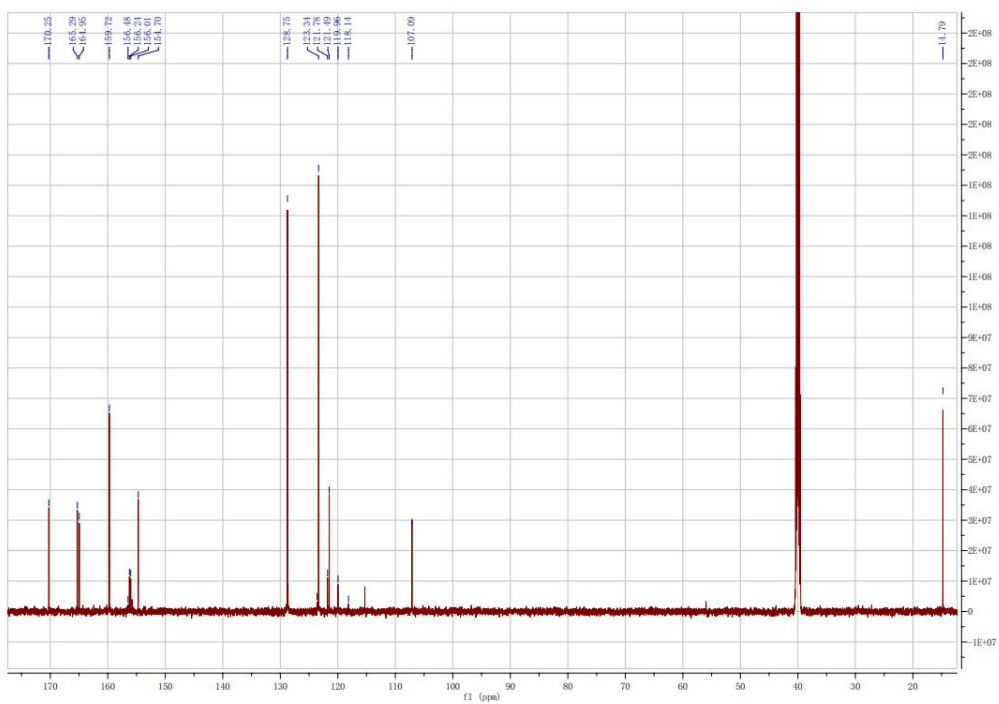

Figure S3. <sup>13</sup>C NMR spectra of compound **6a**

W08-23-1 #22 RT: 0.10 AV: 1 NL: 1.64E8  
T: FTMS + p ESI Full ms [100.0000-1500.0000]

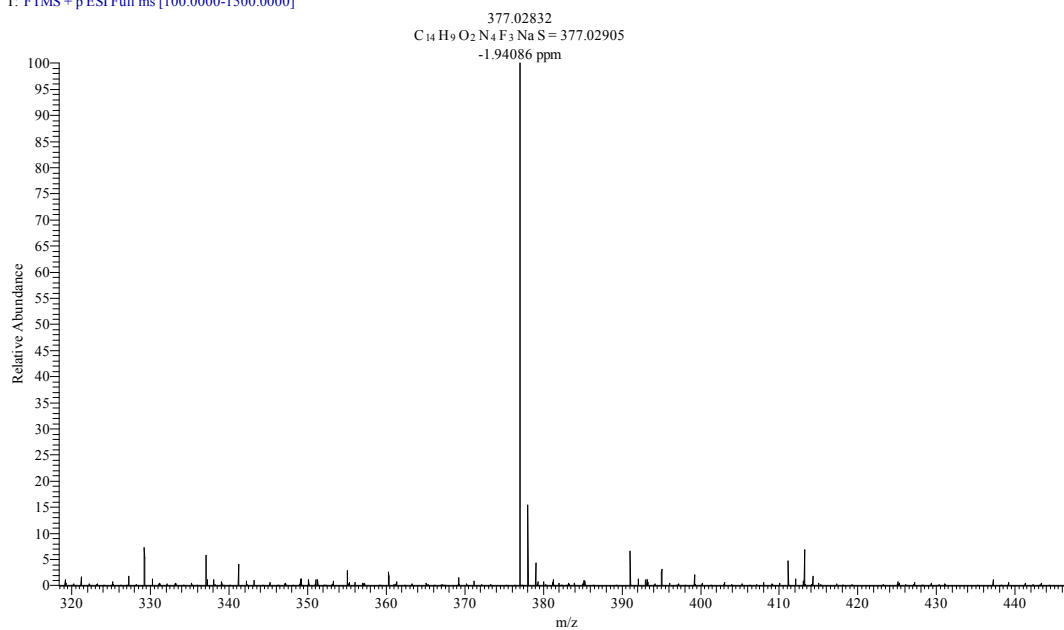

Figure S4. HMRS spectra of compound **6a**

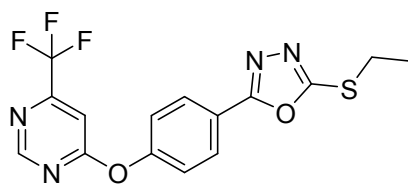

Figure S5. The structure of compound **6b**

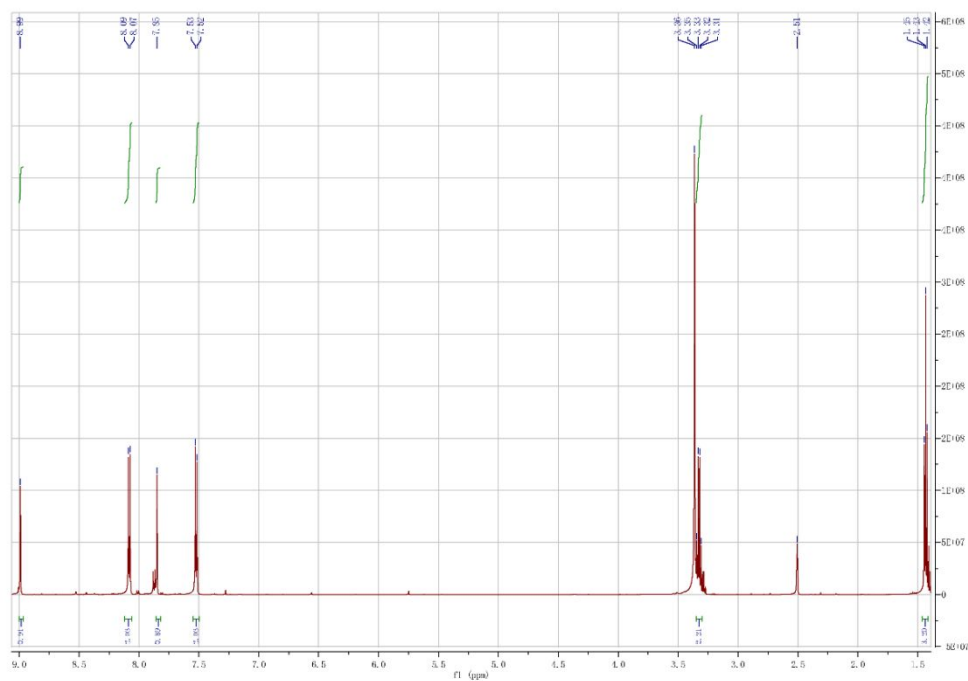

Figure S6. <sup>1</sup>H NMR spectra of compound **6b**

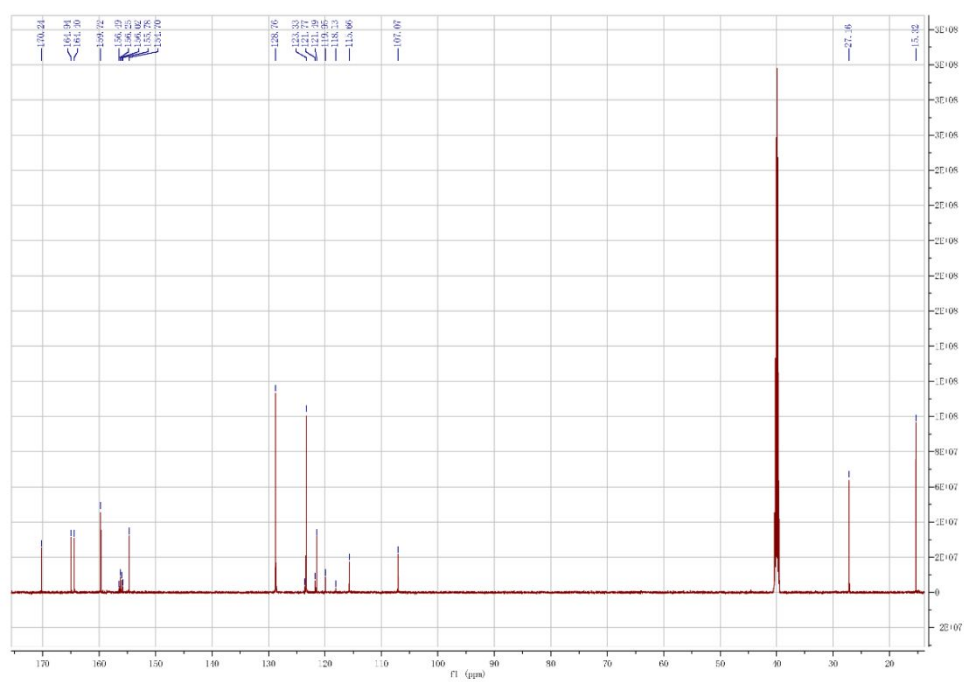

Figure S7. <sup>13</sup>C NMR spectra of compound **6b**

W08-23-2 #23 RT: 0.10 AV: 1 NL: 2.15E8  
T: FIMS + p ESI Full ms [100.0000-1500.0000]

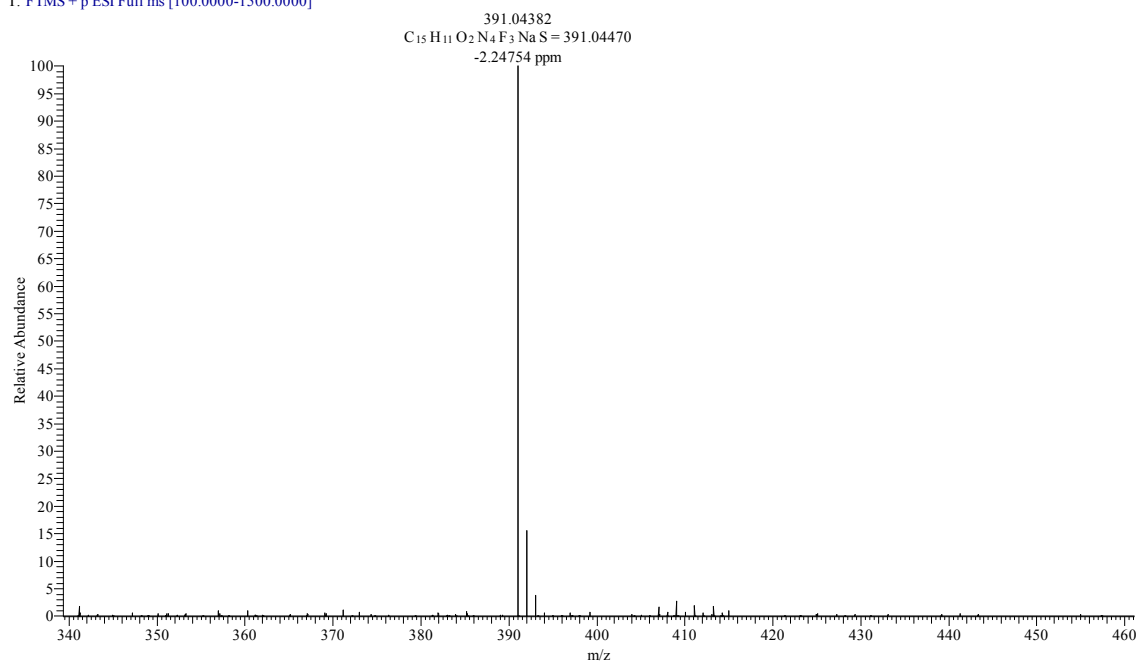

Figure S8. HMRS spectra of compound **6b**

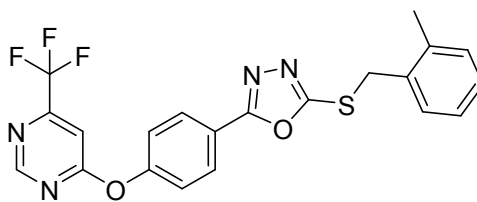

Figure S9. The structure of compound **6c**

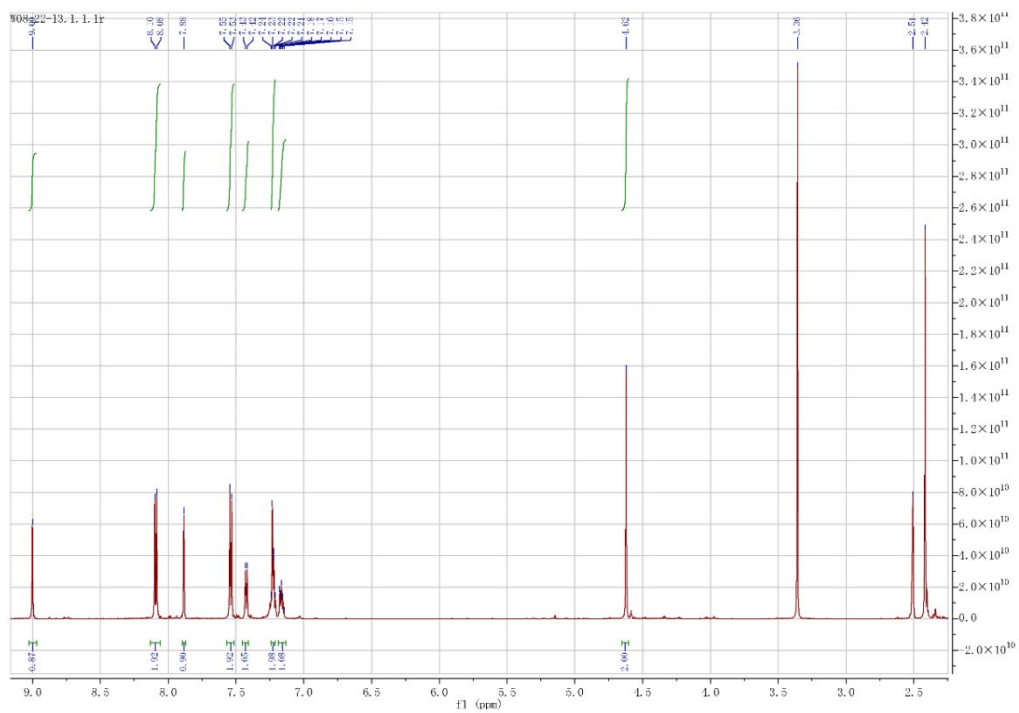

Figure S10. <sup>1</sup>H NMR spectra of compound **6c**

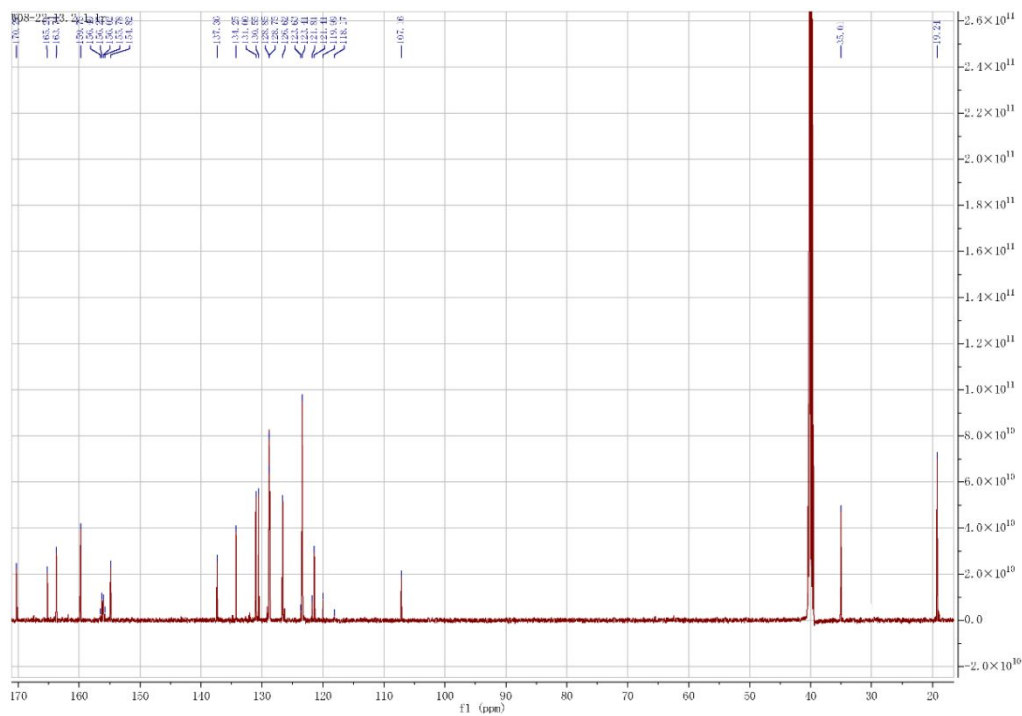

Figure S11. <sup>13</sup>C NMR spectra of compound **6c**

W08-23-3 #23 RT: 0.10 AV: 1 NL: 8.78E8  
T: FTMS + p ESI Full ms [100.0000-1500.0000]

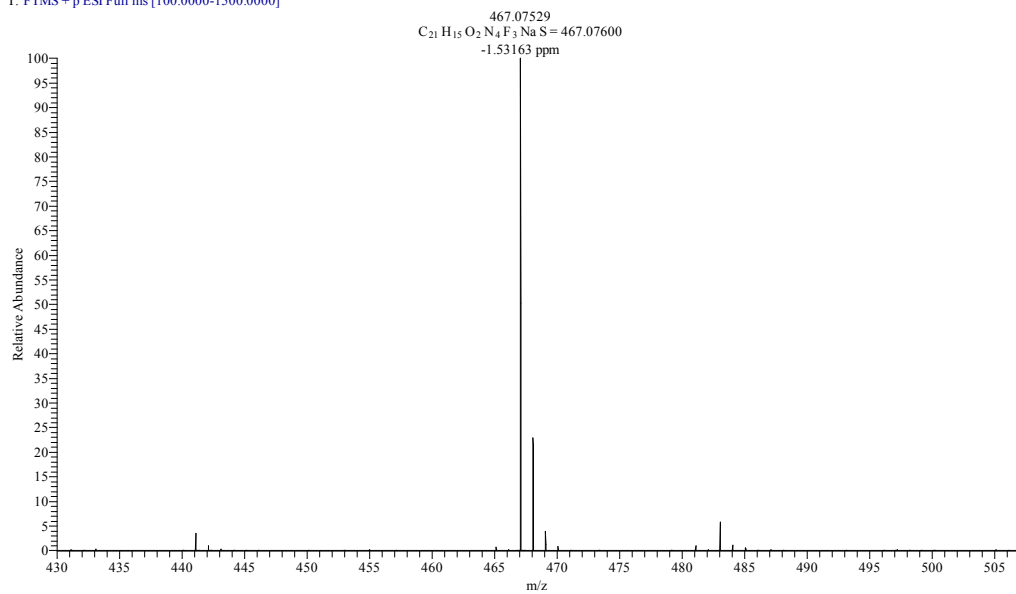

Figure S12. HMRS spectra of compound **6c**

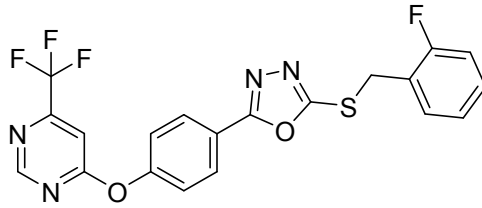

Figure S13. The structure of compound **6d**

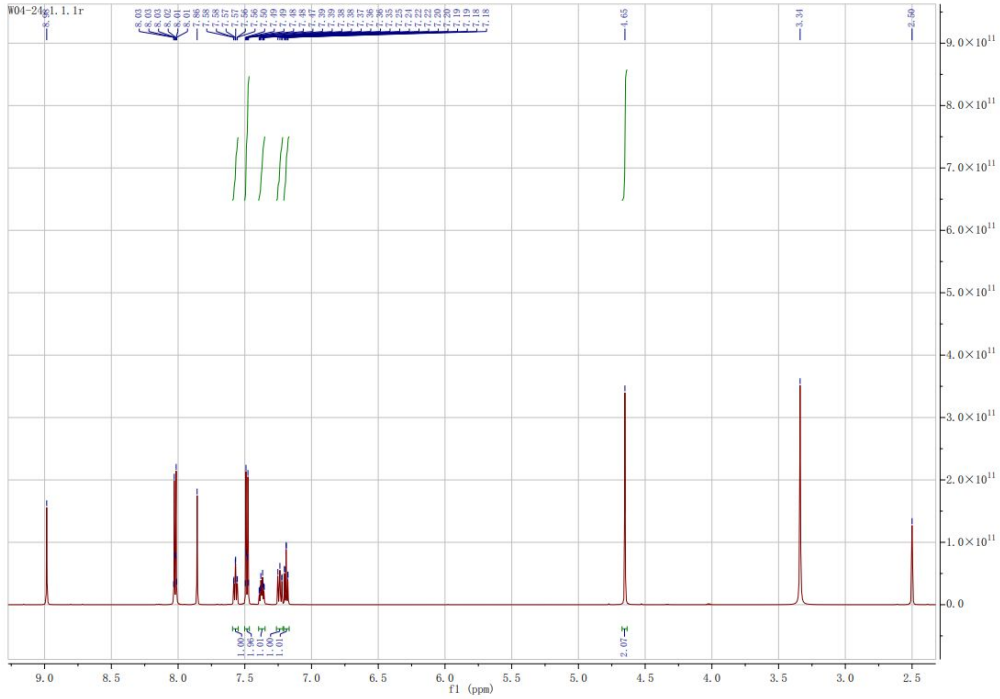

Figure S14. <sup>1</sup>H NMR spectra of compound **6d**

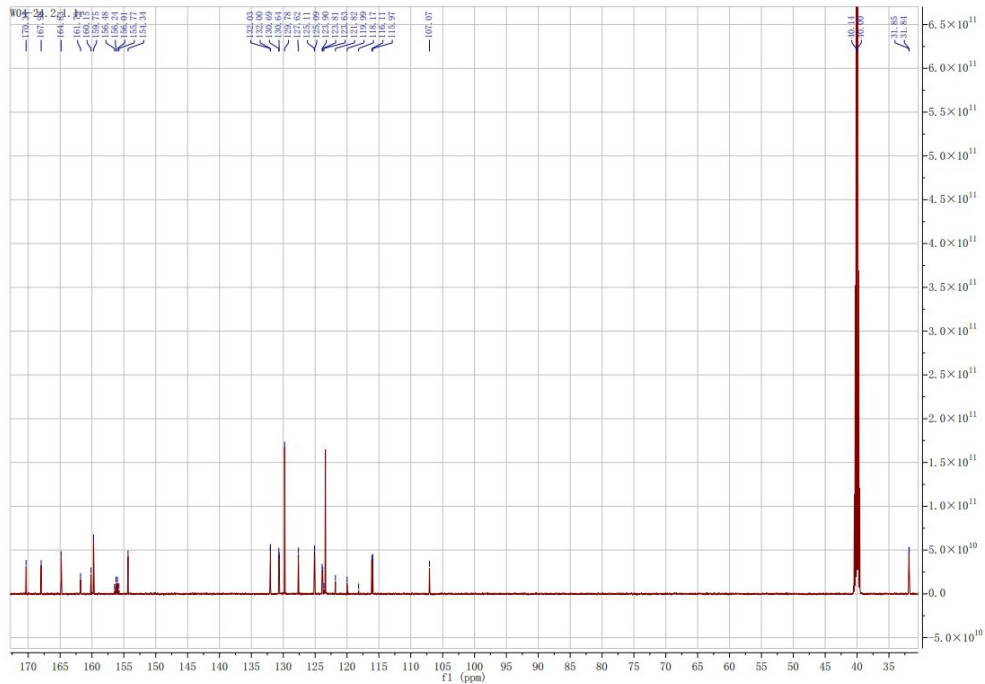

Figure S15. <sup>13</sup>C NMR spectra of compound **6d**



W08-23-4 #24 RT: 0.11 AV: 1 NL: 5.38E8  
T: FIMS + p ESI Full ms [100.0000-1500.0000]

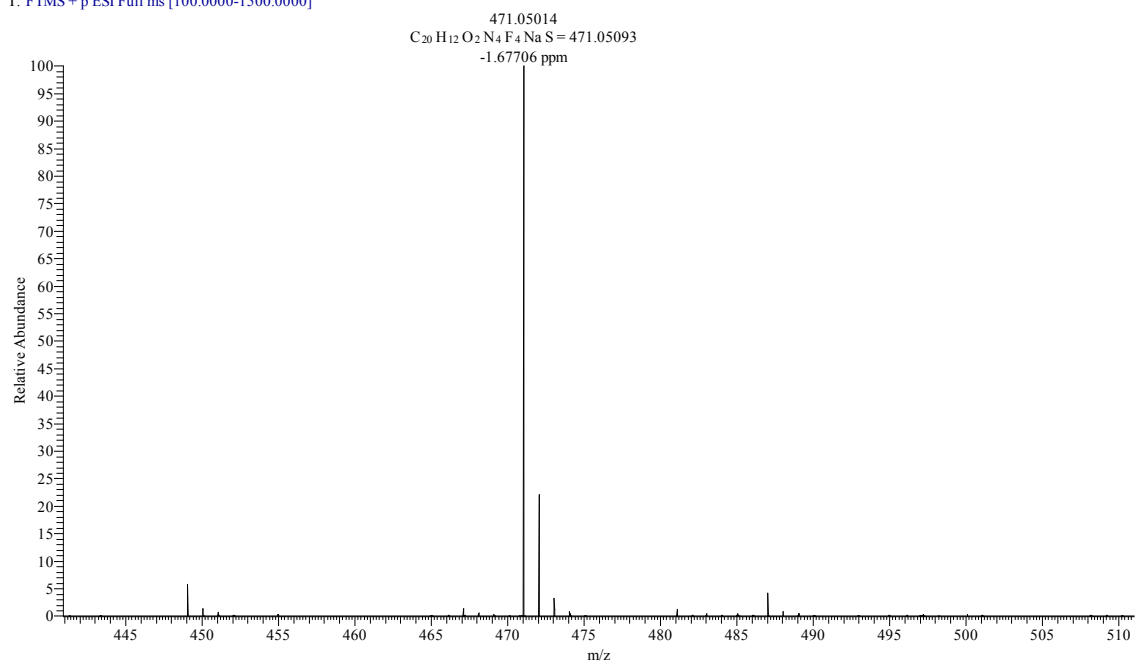

Figure S16. HMRS spectra of compound **6d**

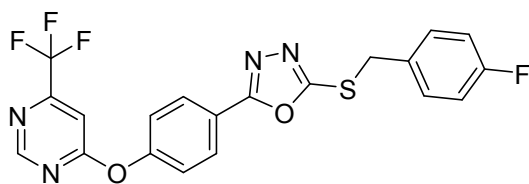

Figure S17. The structure of compound **6e**

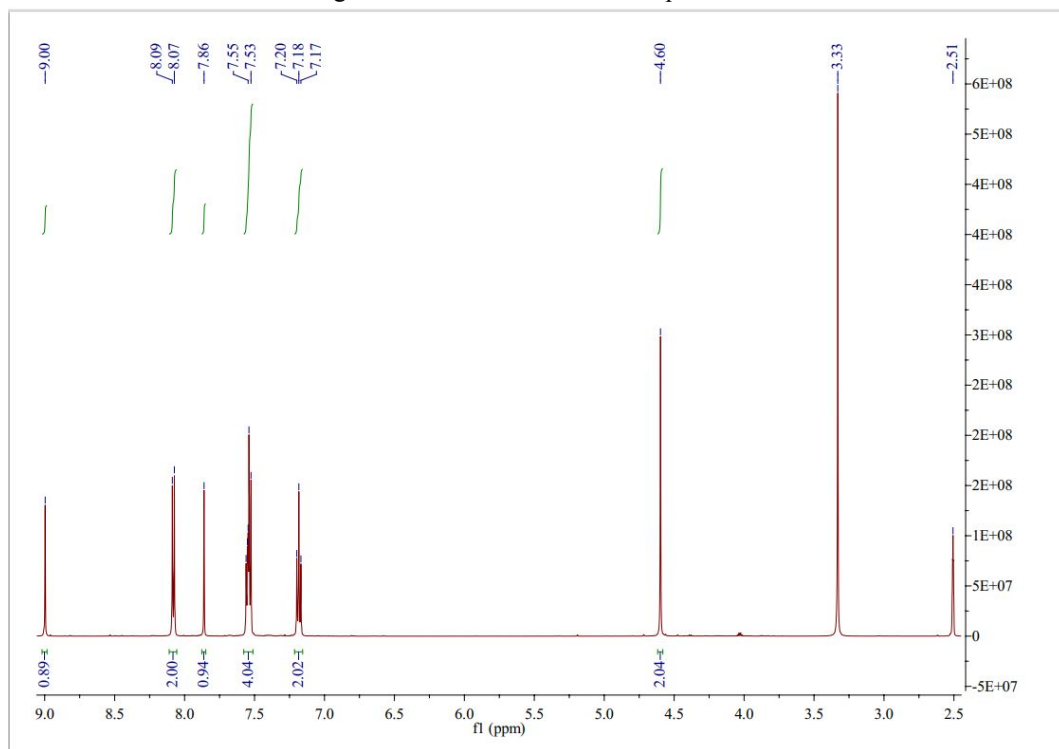

Figure S18. <sup>1</sup>H NMR spectra of compound **6e**

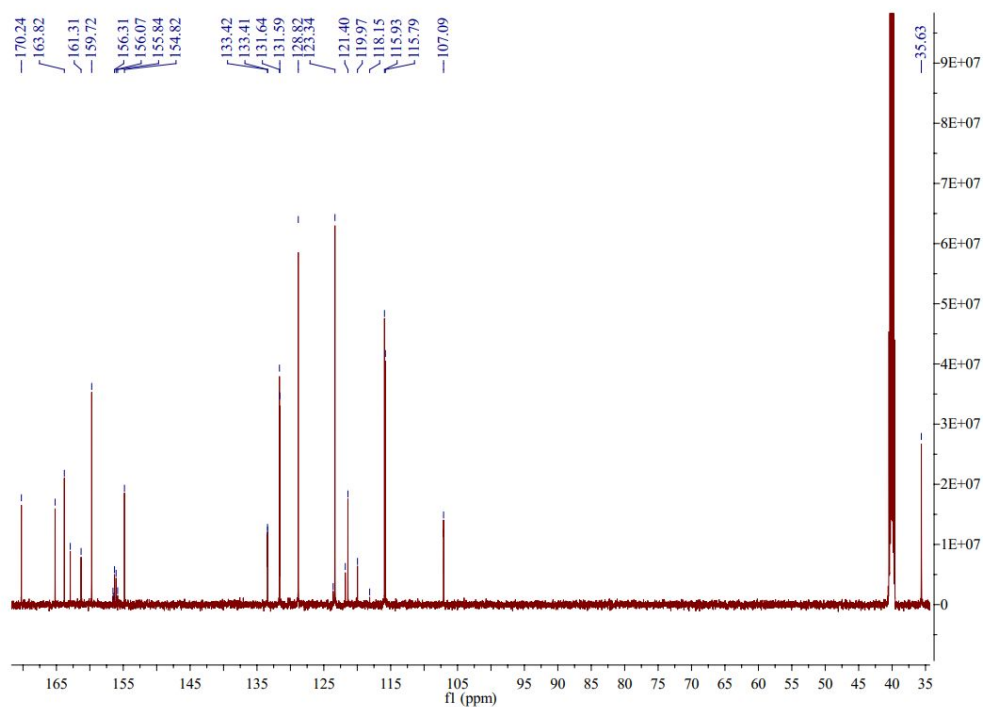

Figure S19. <sup>13</sup>C NMR spectra of compound **6e**

W08-23-5 #23 RT: 0.10 AV: 1 NL: 3.60E8  
T: FIMS + p ESI Full ms [100.0000-1500.0000]

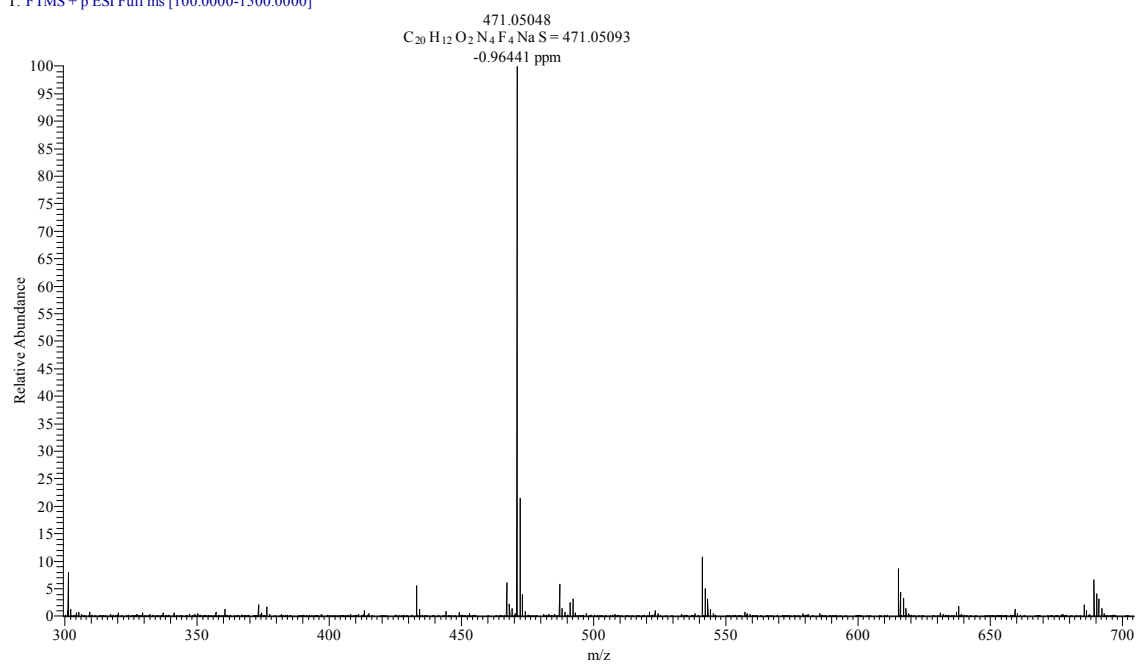

Figure S20. HMRS spectra of compound **6e**

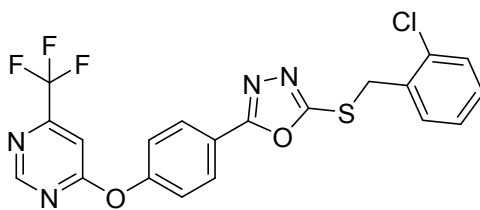

Figure S21. The structure of compound 6f

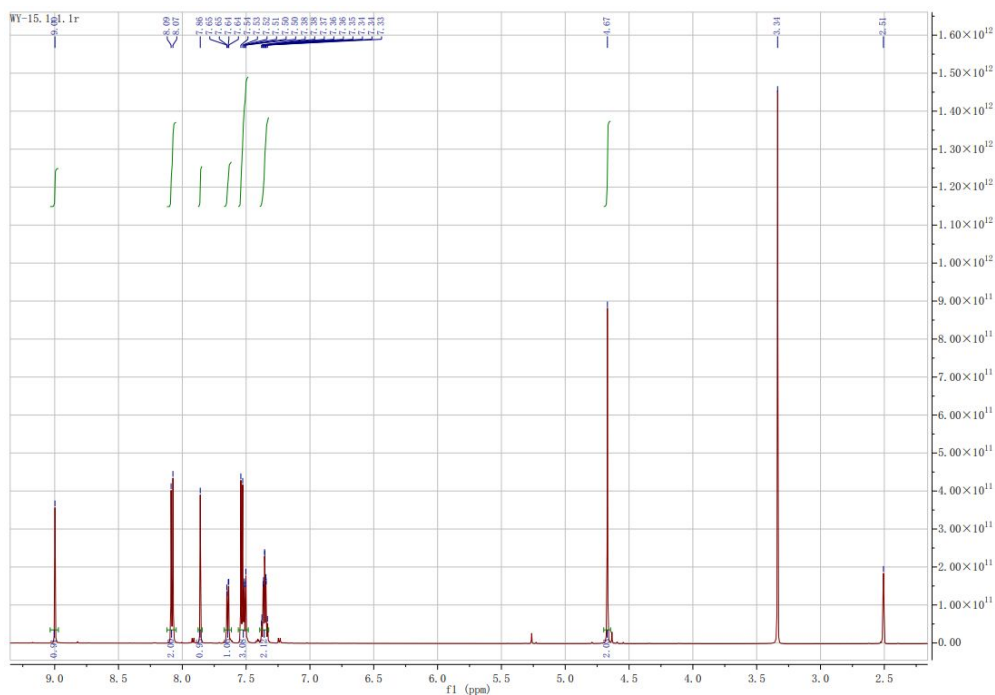

Figure S22. <sup>1</sup>H NMR spectra of compound 6f

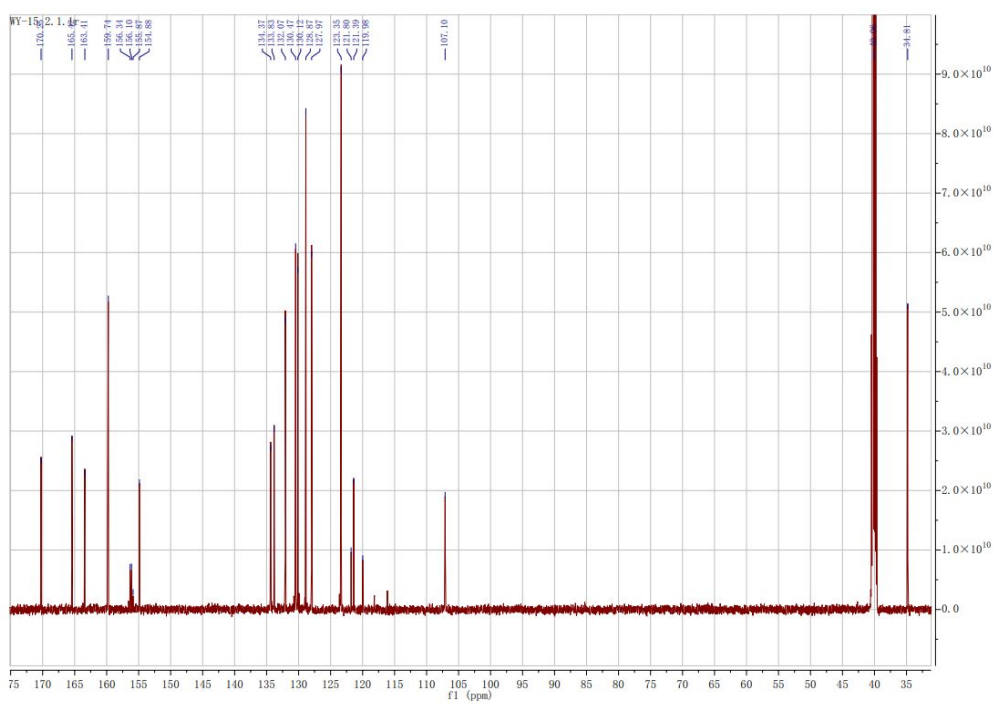

Figure S23. <sup>13</sup>C NMR spectra of compound 6f

W08-23-6 #24 RT: 0.11 AV: 1 NL: 3.32E8  
T: FIMS + p ESI Full ms [100.0000-1500.0000]

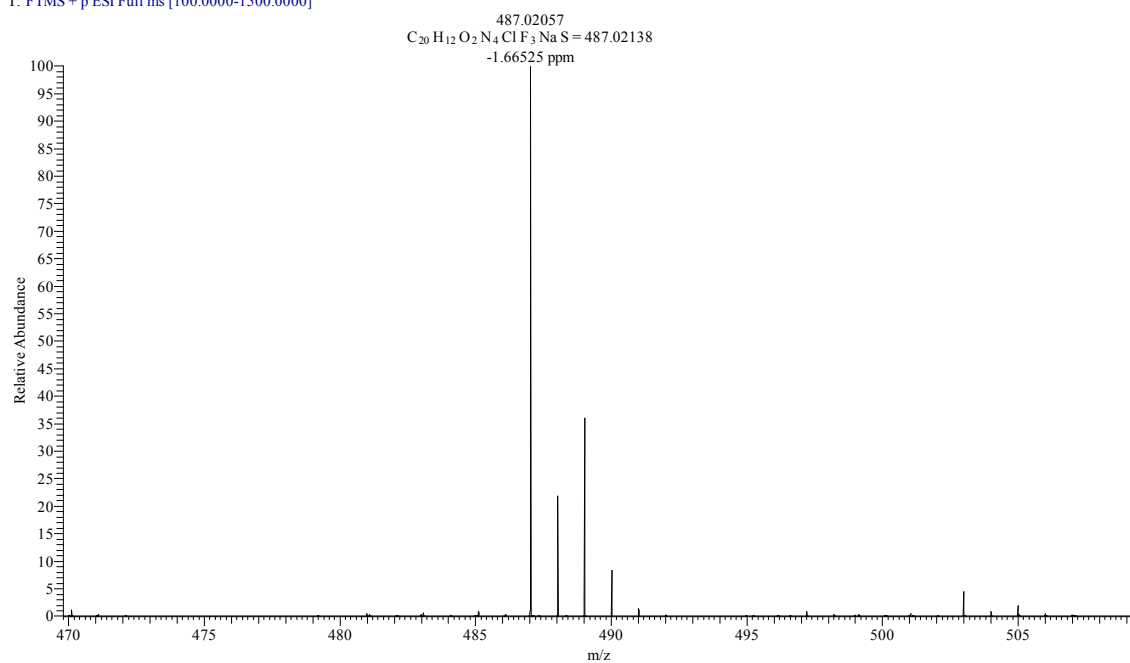

Figure S24. HMRS spectra of compound **6f**

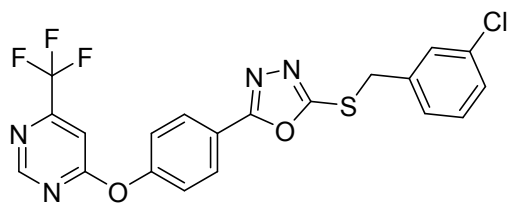

Figure S25. The structure of compound **6g**

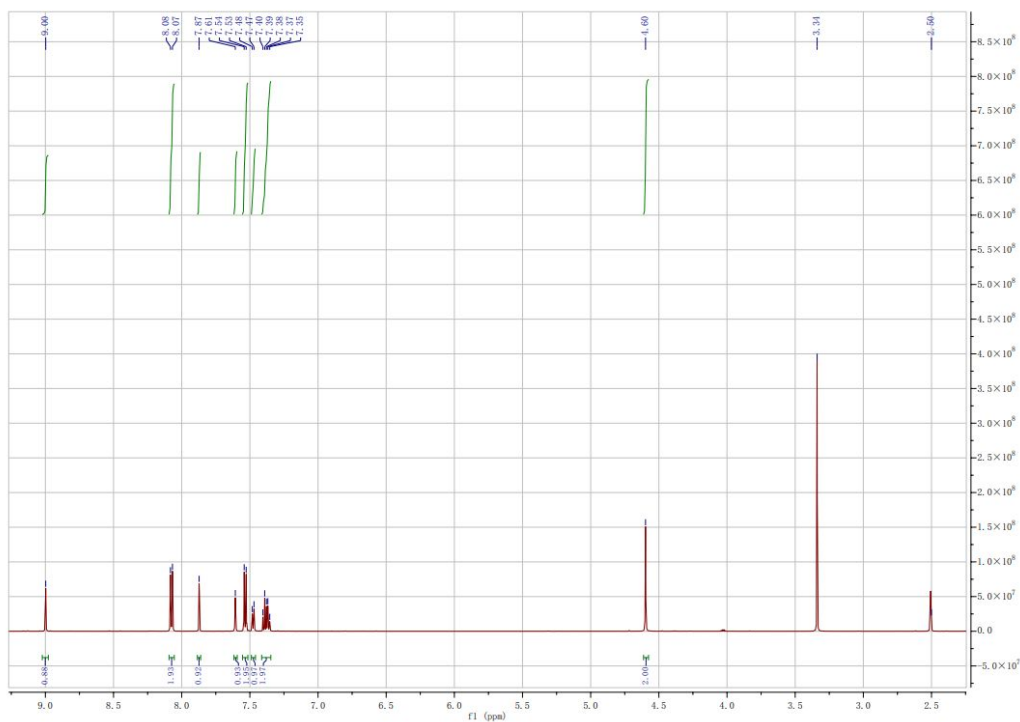

Figure S26.  $^1\text{H}$  NMR spectra of compound **6g**

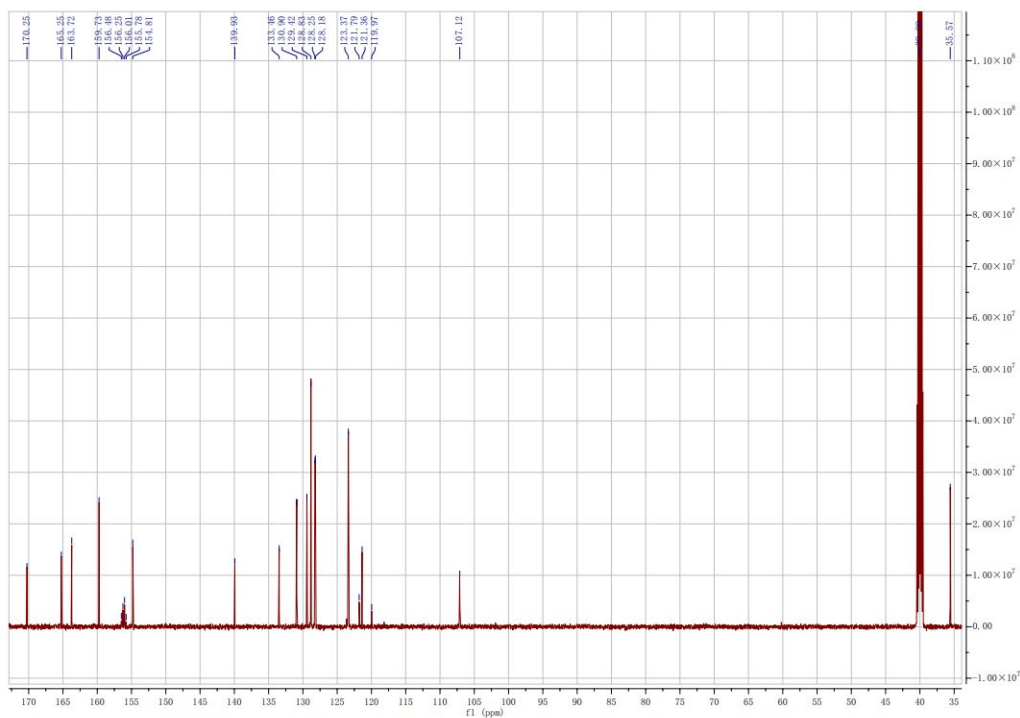

Figure S27.  $^{13}\text{C}$  NMR spectra of compound **6g**

W08-23-7 #23 RT: 0.10 AV: 1 NL: 1.83E8  
T: FTMS + p ESI Full ms [100.0000-1500.0000]

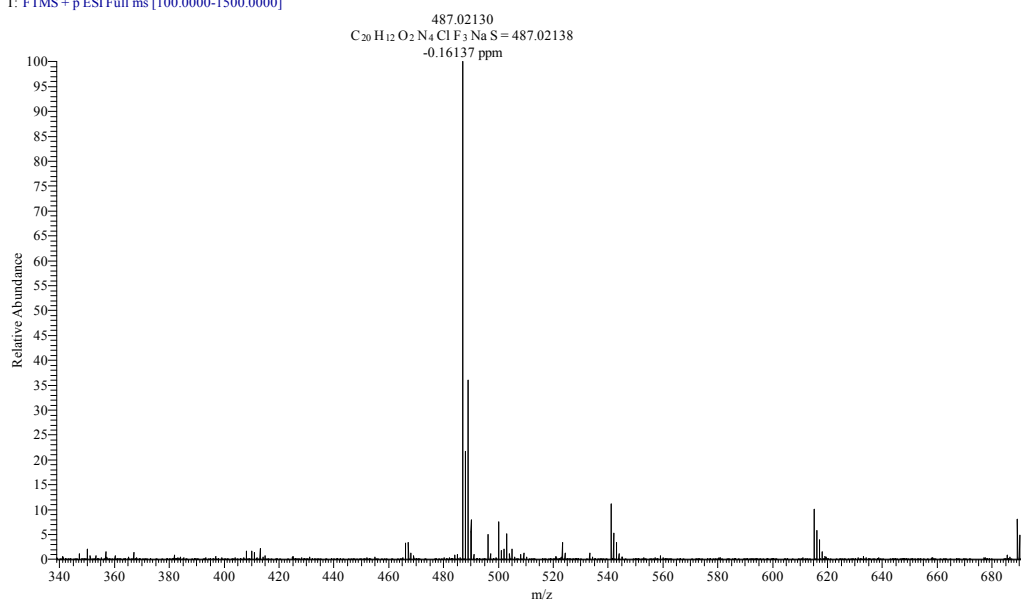

Figure S28. HMRS spectra of compound **6g**

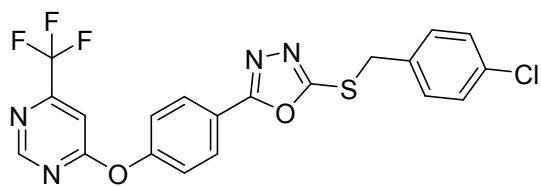

Figure S29. The structure of compound **6h**

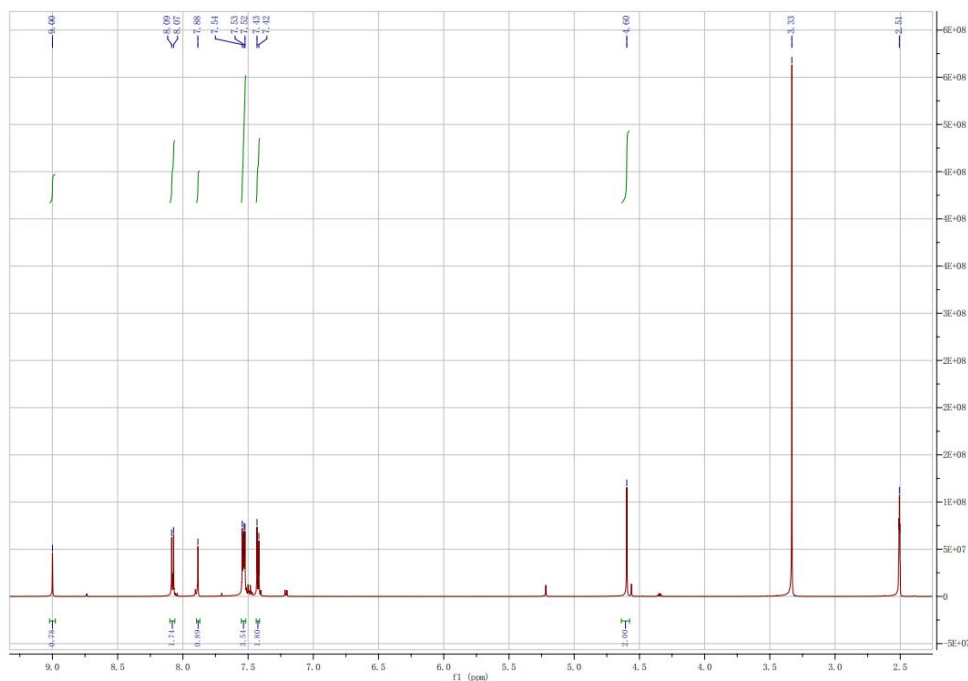

Figure S30. <sup>1</sup>H NMR spectra of compound **6h**

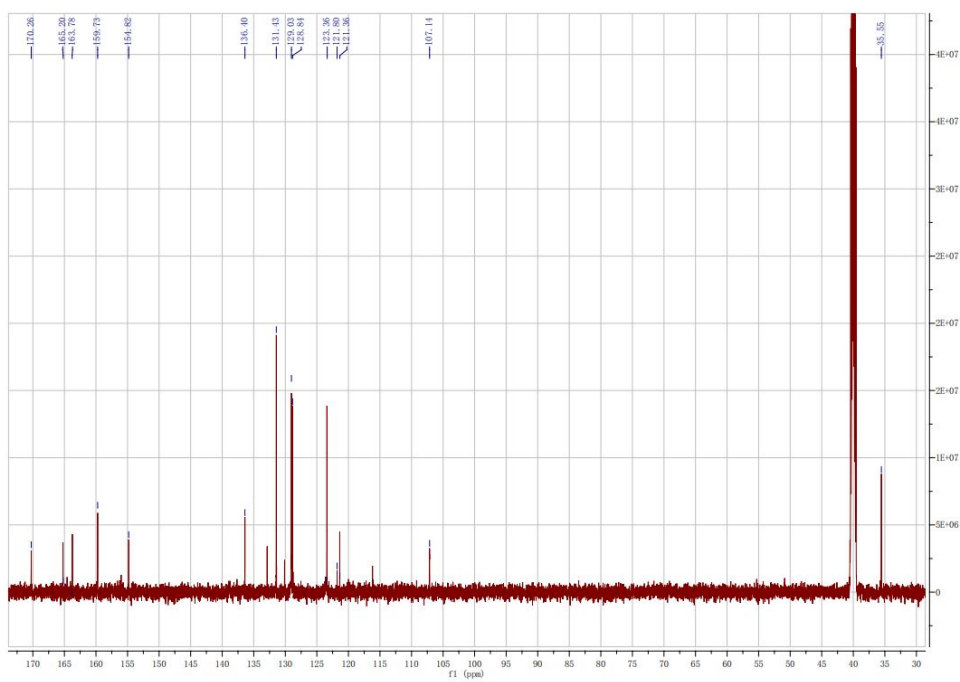

Figure S31. <sup>13</sup>C NMR spectra of compound **6h**



W08-23-S #24 RT: 0.11 AV: 1 NL: 1.15E8  
T: FIMS + p ESI Full ms [100.0000-1500.0000]

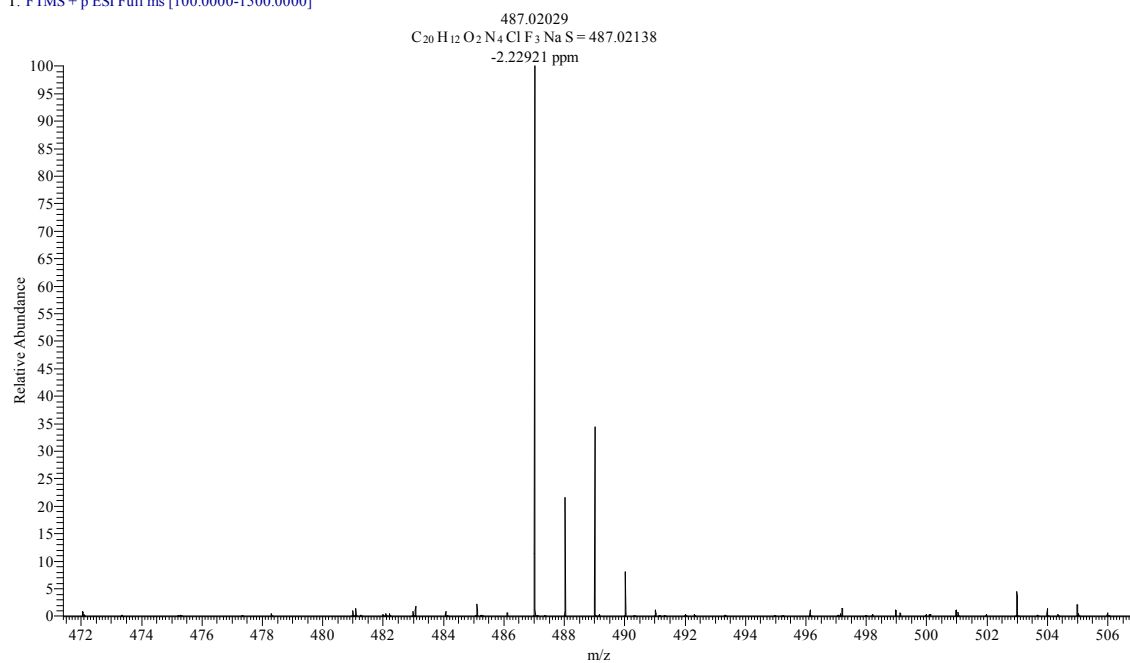

Figure S32. HMRS spectra of compound **6h**

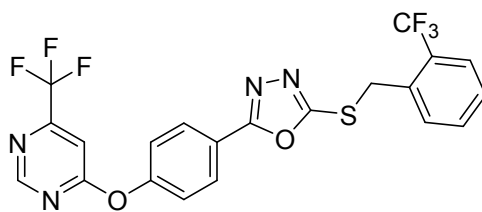

Figure S33. The structure of compound **6i**

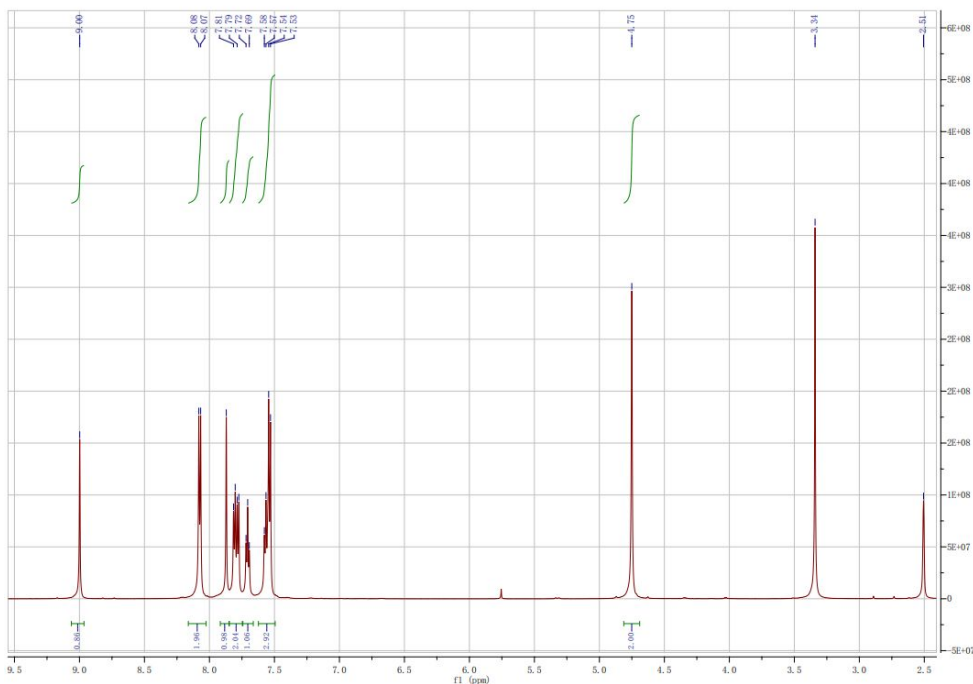

Figure S34. <sup>1</sup>H NMR spectra of compound **6i**

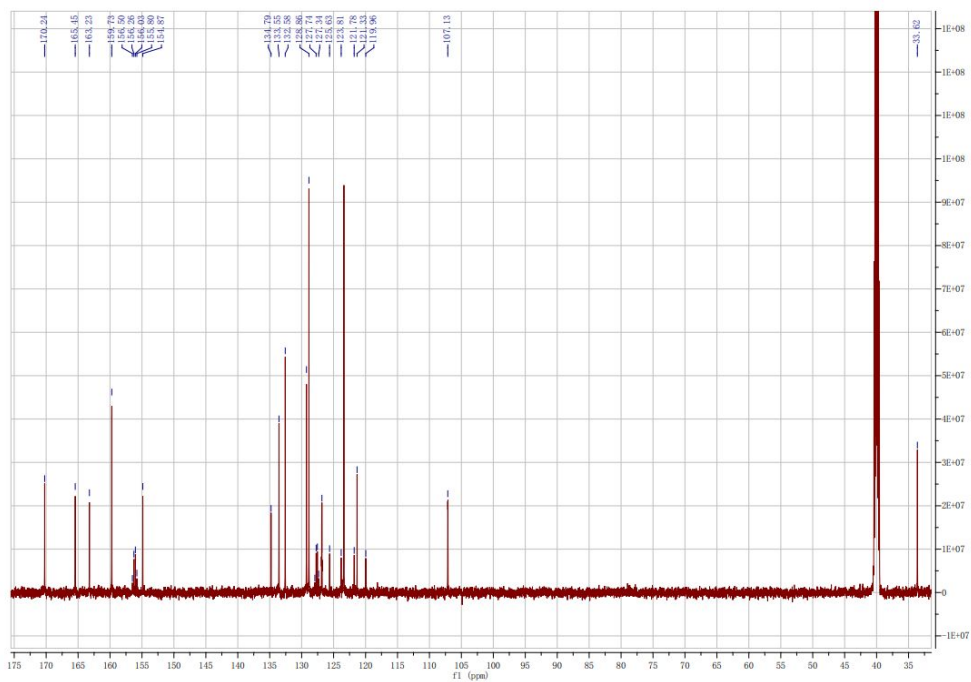

Figure S35. <sup>13</sup>C NMR spectra of compound **6i**

W08-23-9 #23 RT: 0.10 AV: 1 NL: 1.22E9  
T: FIMS + p ESI Full ms [100.0000-1500.0000]

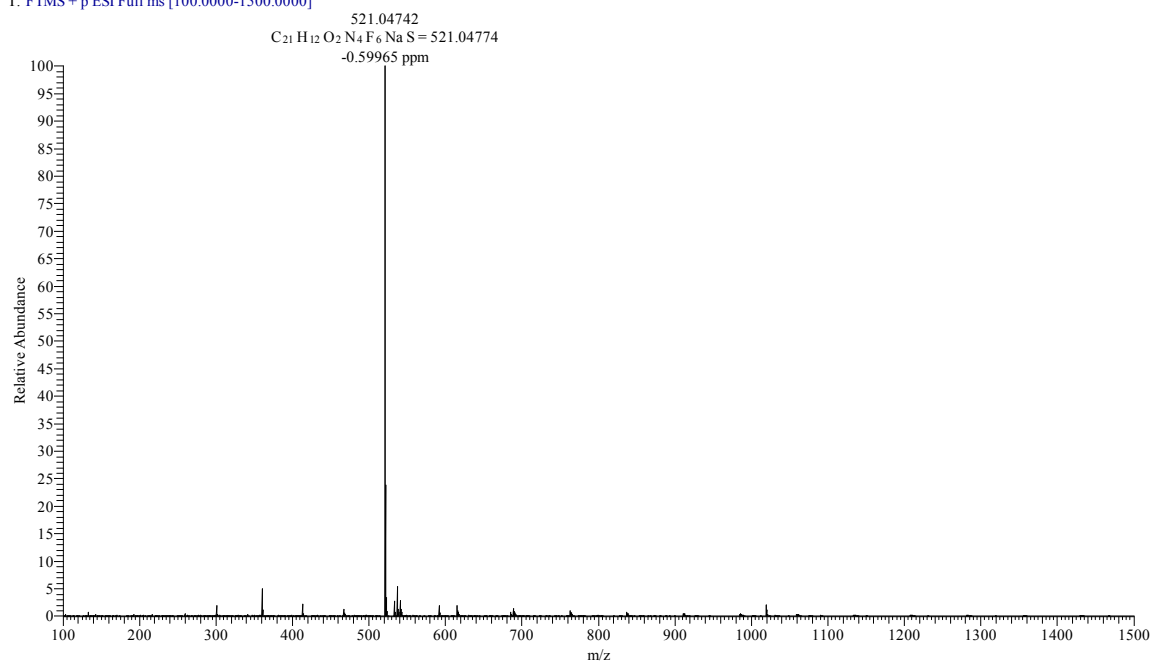

Figure S36. HMRS spectra of compound **6i**

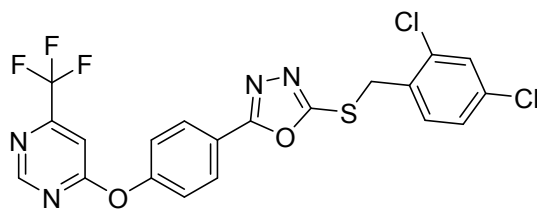

Figure S37. The structure of compound **6j**

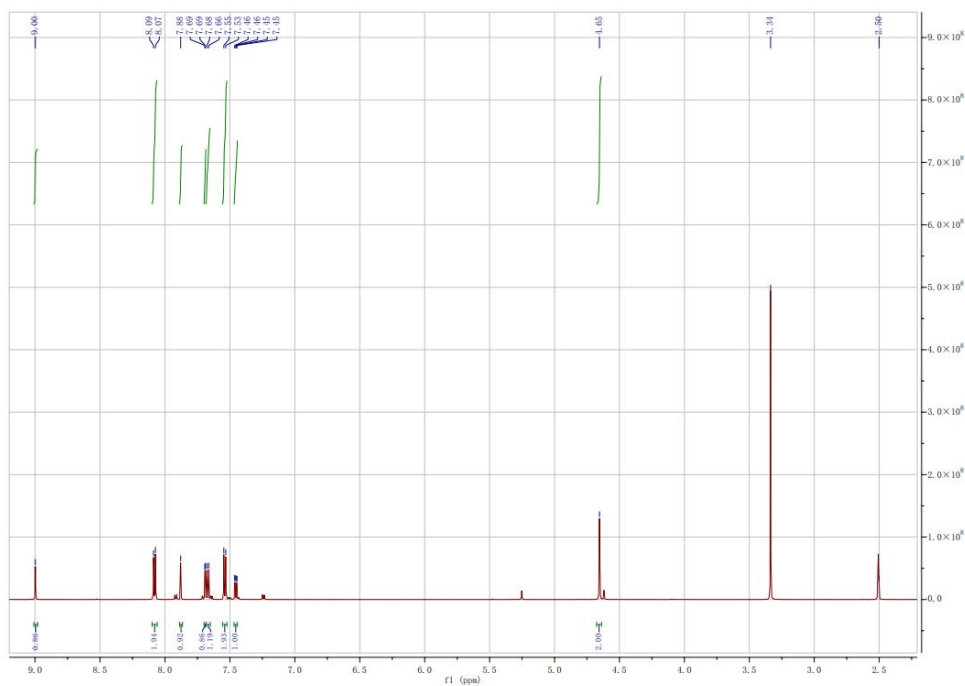

Figure S38.  $^1\text{H}$  NMR spectra of compound **6j**

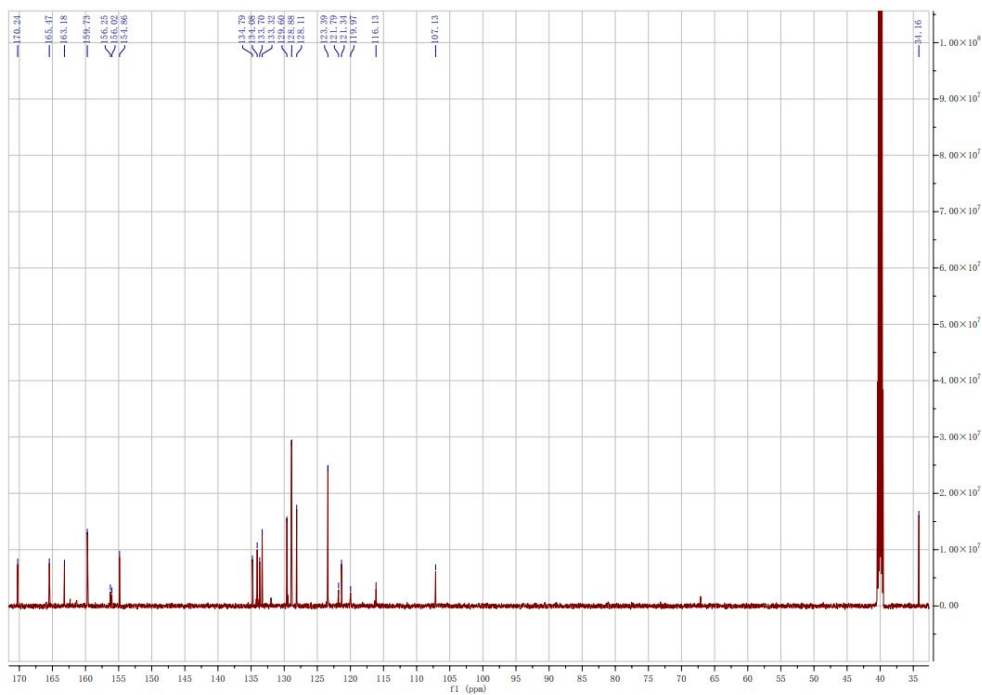

Figure S39.  $^{13}\text{C}$  NMR spectra of compound **6j**

W08-23-12 #24 RT: 0.11 AV: 1 NL: 8.28E7  
T: FTMS + p ESI Full ms [100.0000-1500.0000]

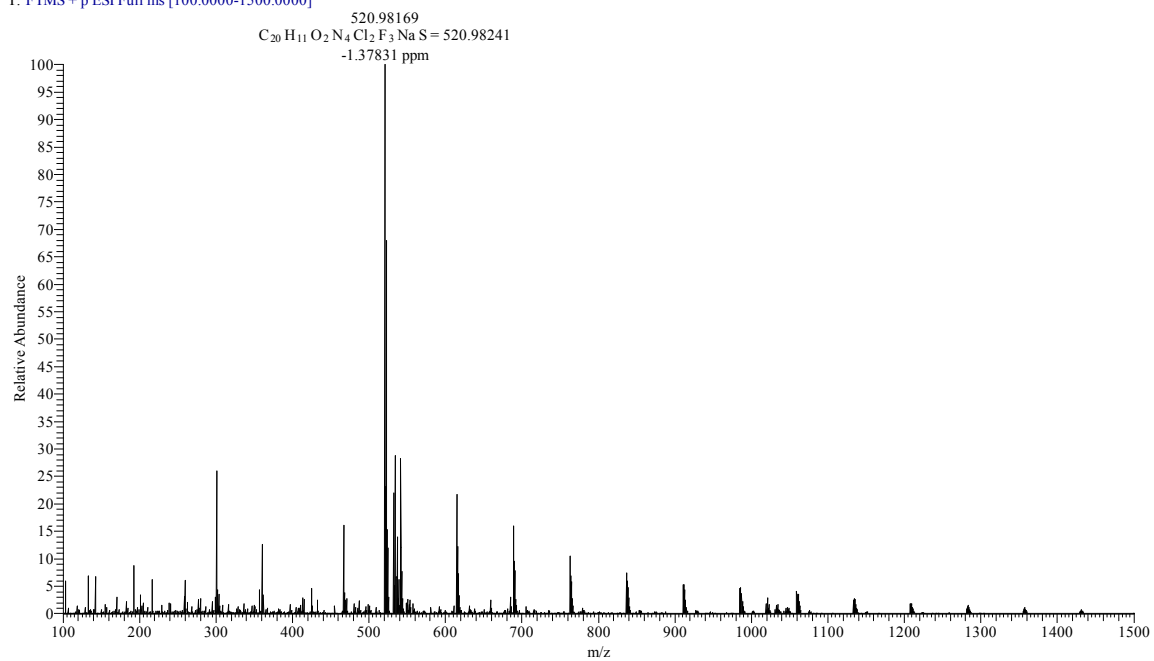

Figure S40. HMRS spectra of compound **6j**

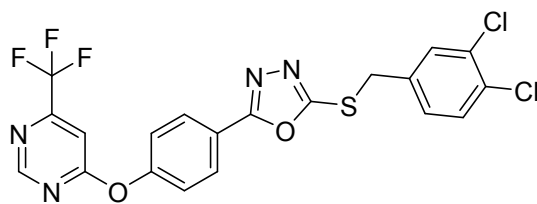

Figure S41. The structure of compound 6k

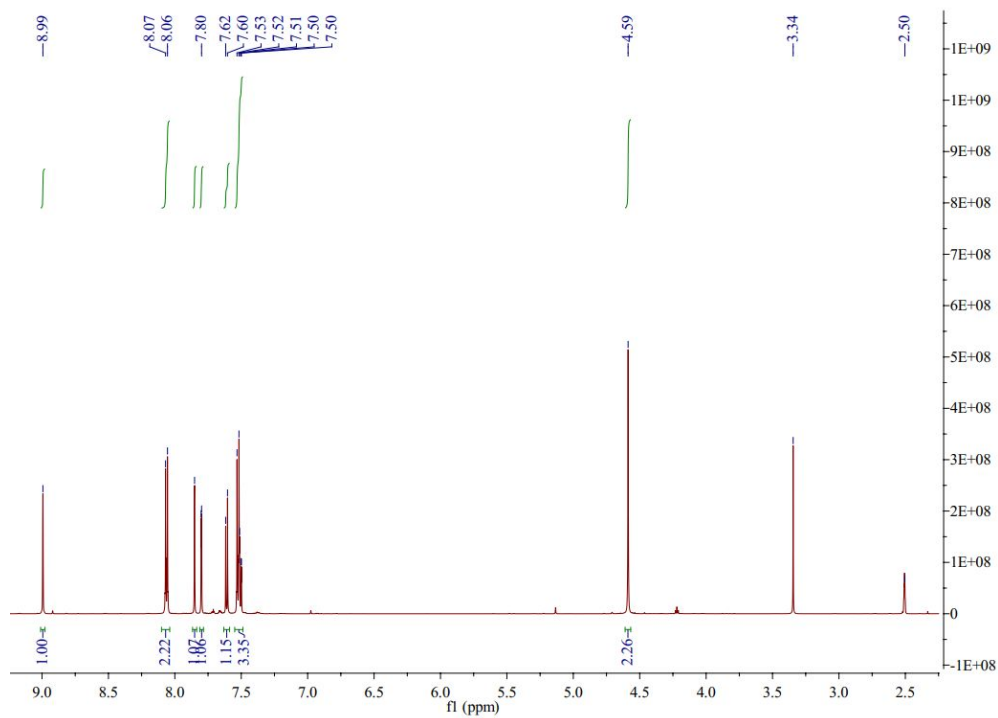

Figure S42. <sup>1</sup>H NMR spectra of compound 6k

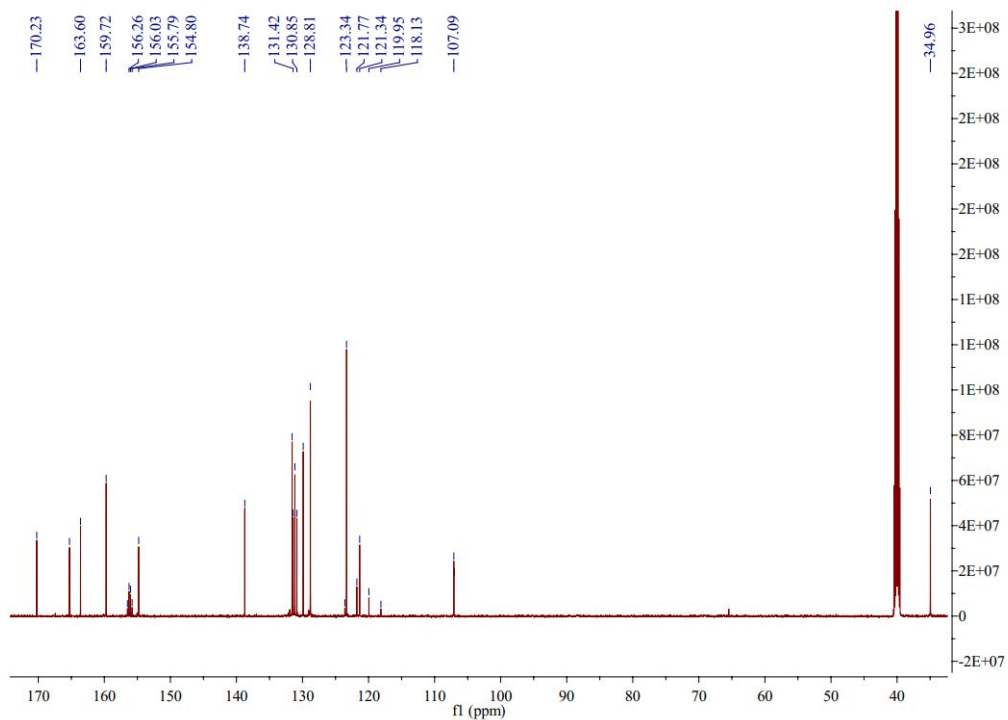

Figure S43. <sup>13</sup>C NMR spectra of compound 6k

W08-23-11 #25 RT: 0.11 AV: 1 NL: 2.52E7  
T: FTMS + p ESI Full ms [100.0000-1500.0000]

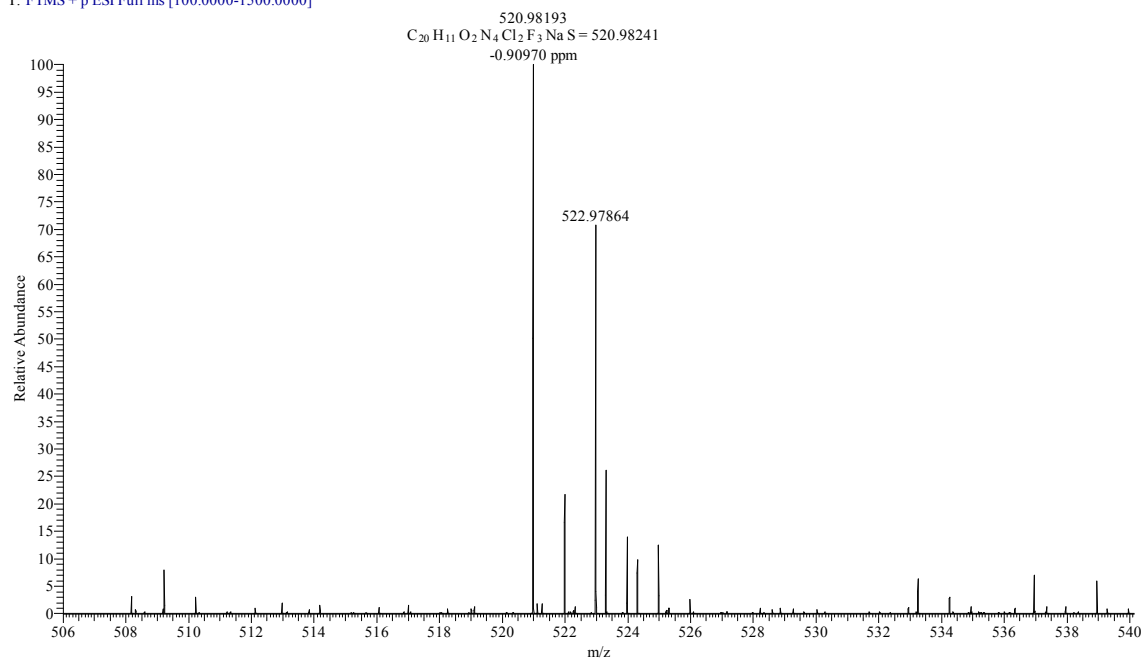

Figure S44.HMRS spectra of compound 6k

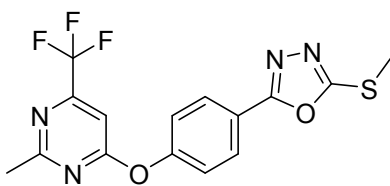

Figure S45. The structure of compound **61**

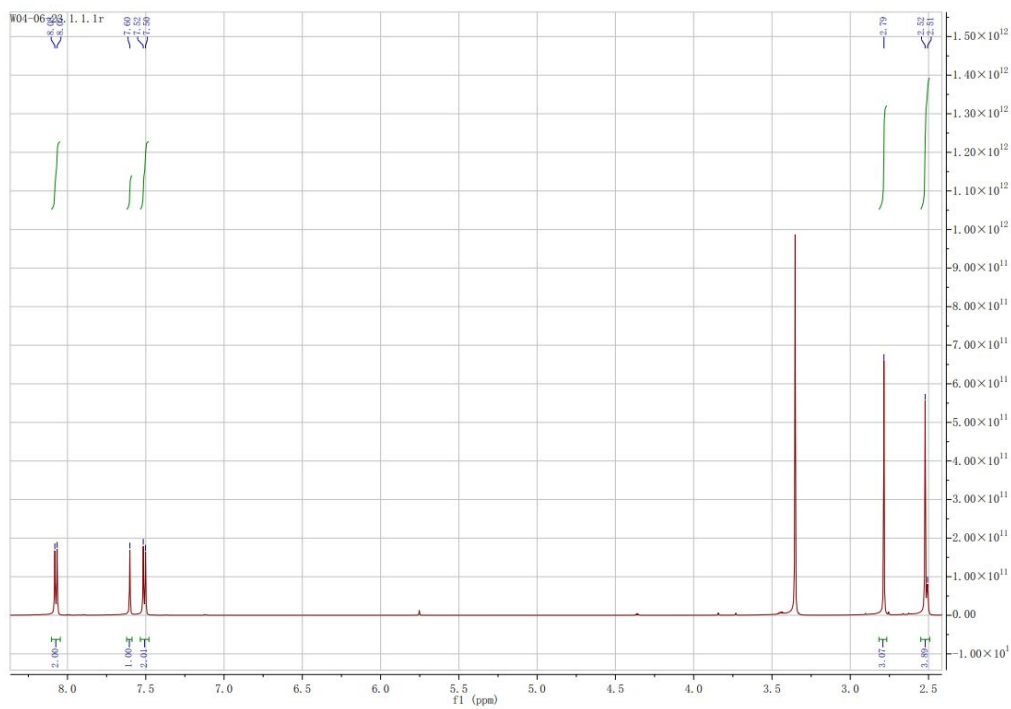

Figure S46.  $^1\text{H}$  NMR spectra of compound **61**

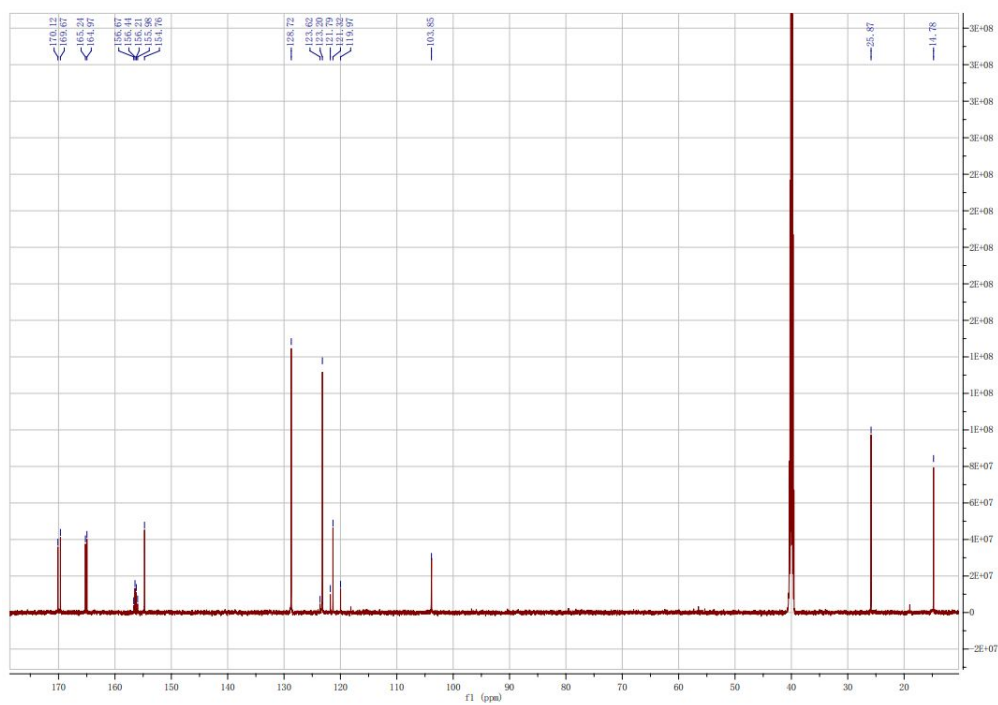

Figure S47.  $^{13}\text{C}$  NMR spectra of compound **61**



W08-23-13 #22 RT: 0.10 AV: 1 NL: 2.01E8  
T: FTMS + p ESI Full ms [100.0000-1500.0000]

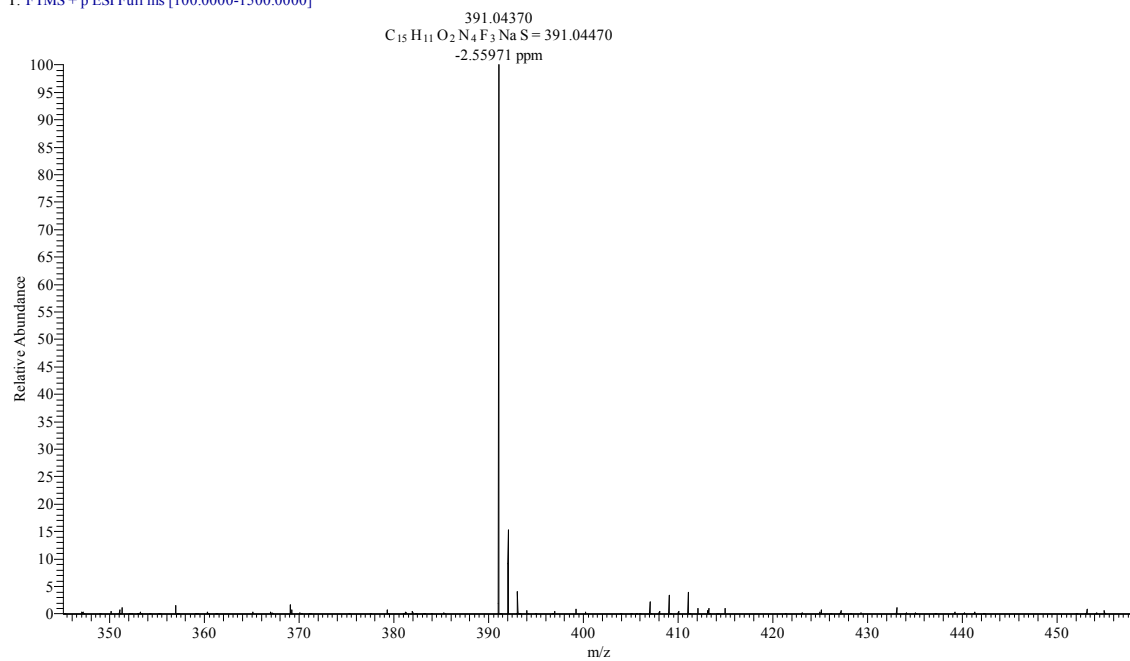

Figure S48. HMRS spectra of compound **61**

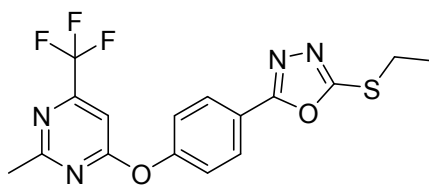

Figure S49. The structure of compound **6m**

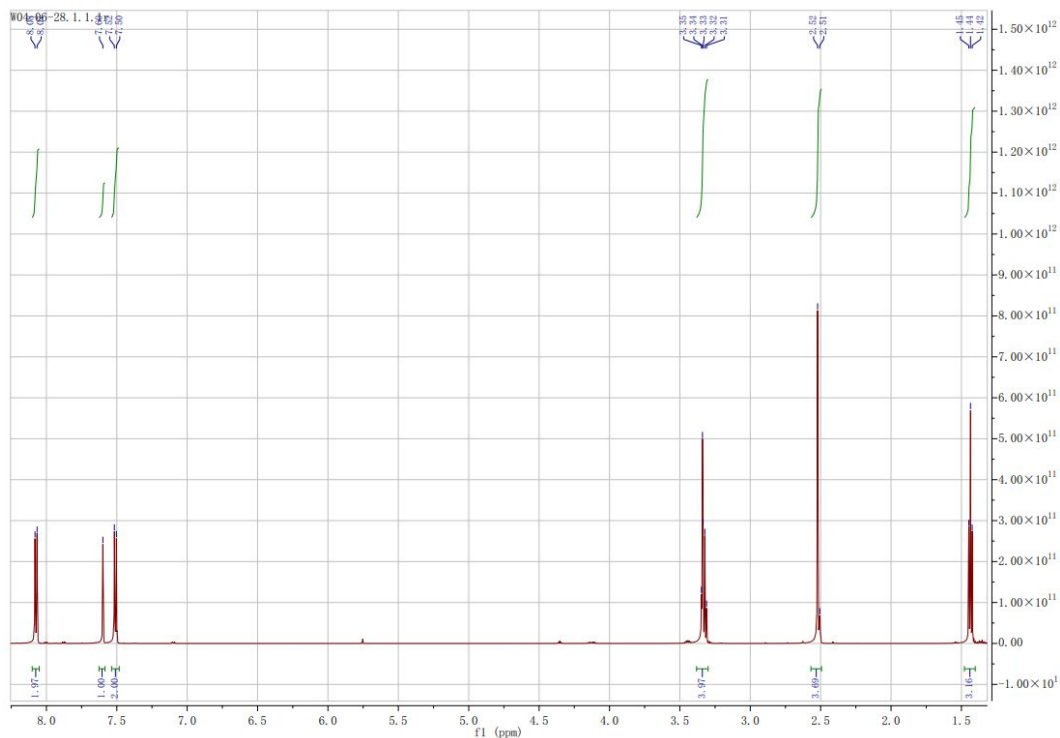

Figure S50. <sup>1</sup>H NMR spectra of compound **6m**

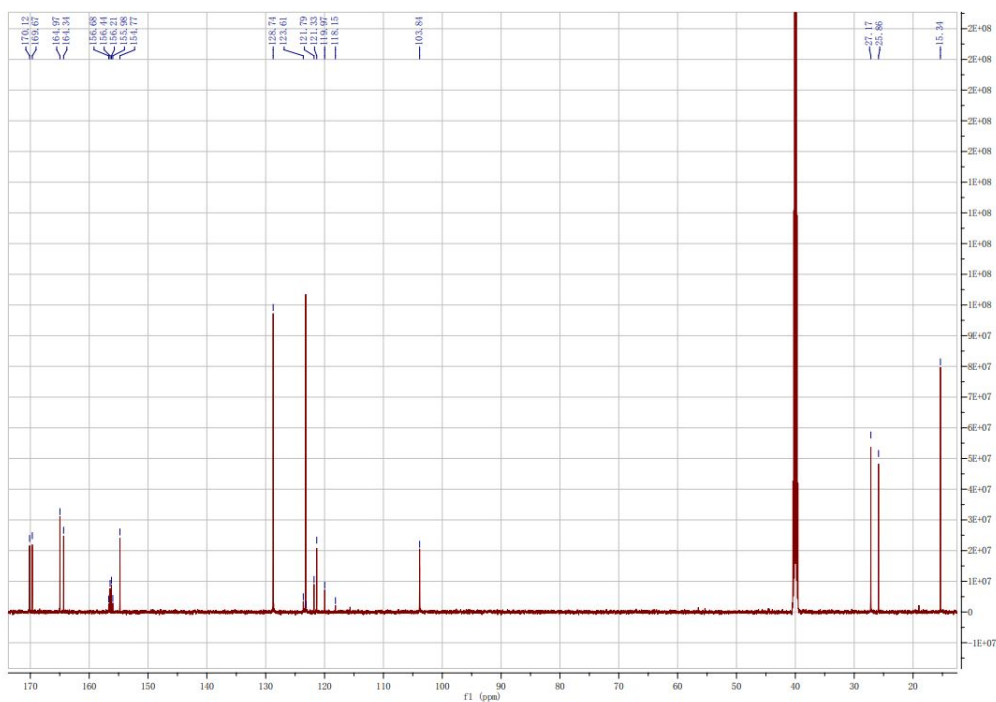

Figure S51. <sup>13</sup>C NMR spectra of compound **6m**

W08-23-14 #23 RT: 0.10 AV: 1 NL: 1.32E9  
T: FTMS + p ESI Full ms [100.0000-1500.0000]

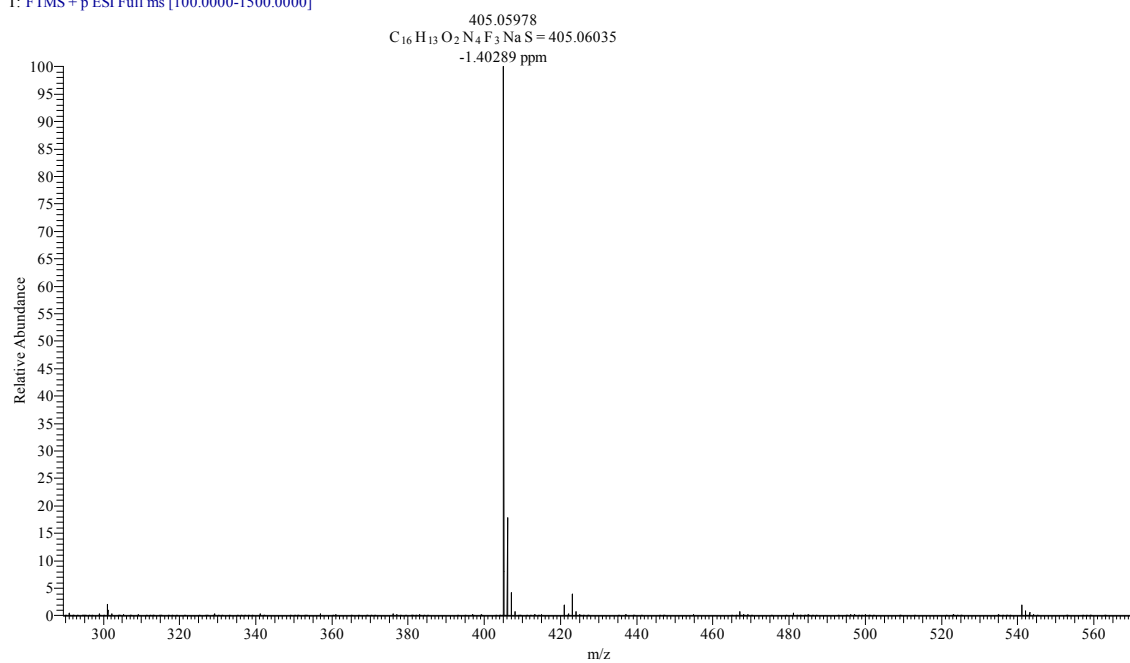

Figure S52. HMRS spectra of compound **6m**

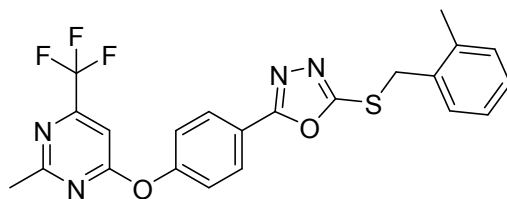

Figure S53. The structure of compound **6n**

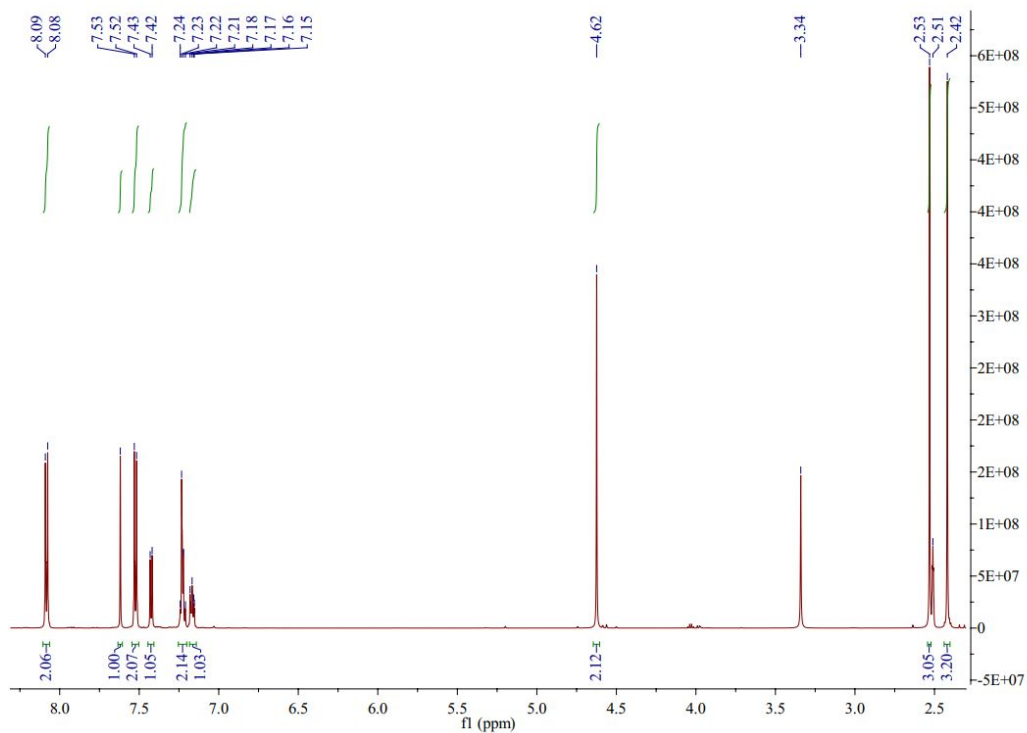

Figure S54.  $^1\text{H}$  NMR spectra of compound **6n**

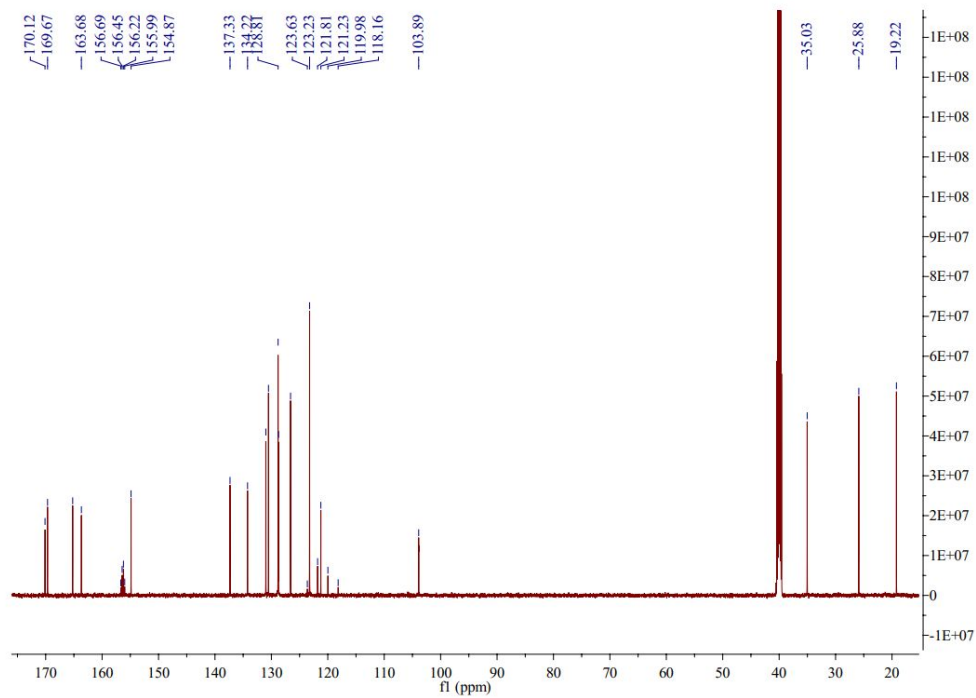

Figure S55.  $^{13}\text{C}$  NMR spectra of compound **6n**

W08-23-15 #24 RT: 0.11 AV: 1 NL: 1.40E9  
T: FTMS + p ESI Full ms [100.0000-1500.0000]

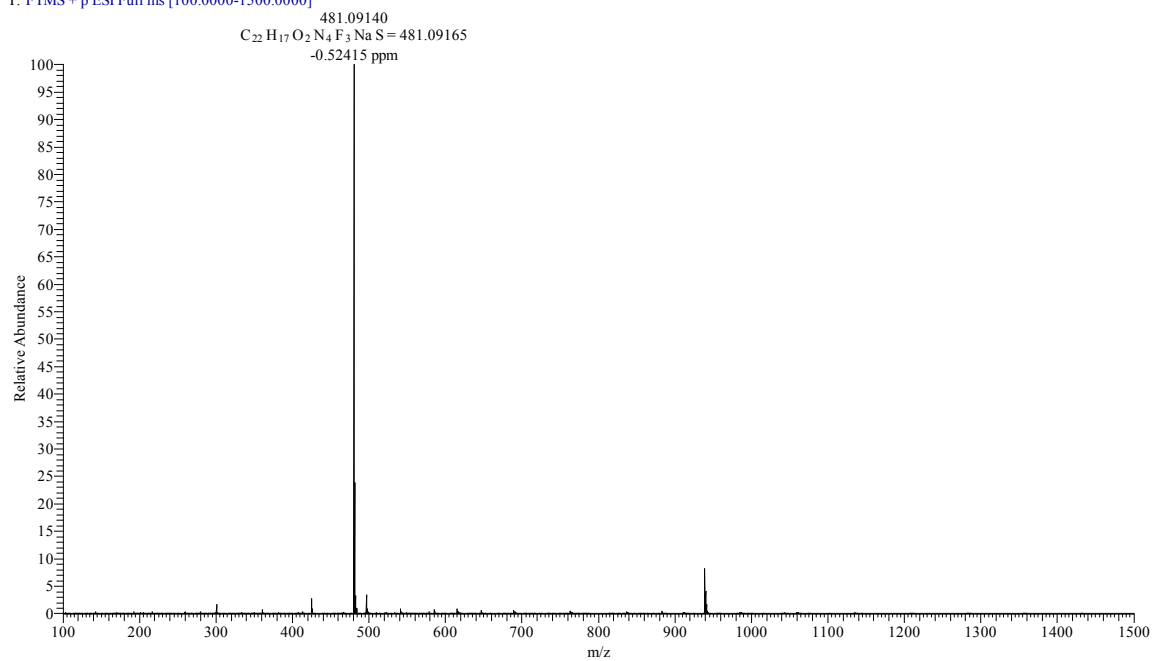

Figure S56. HMRS spectra of compound **6n**

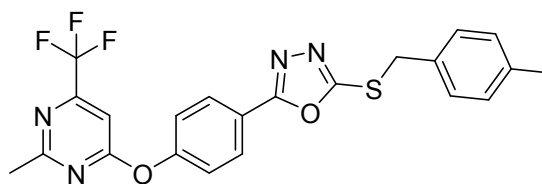

Figure S57. The structure of compound **60**

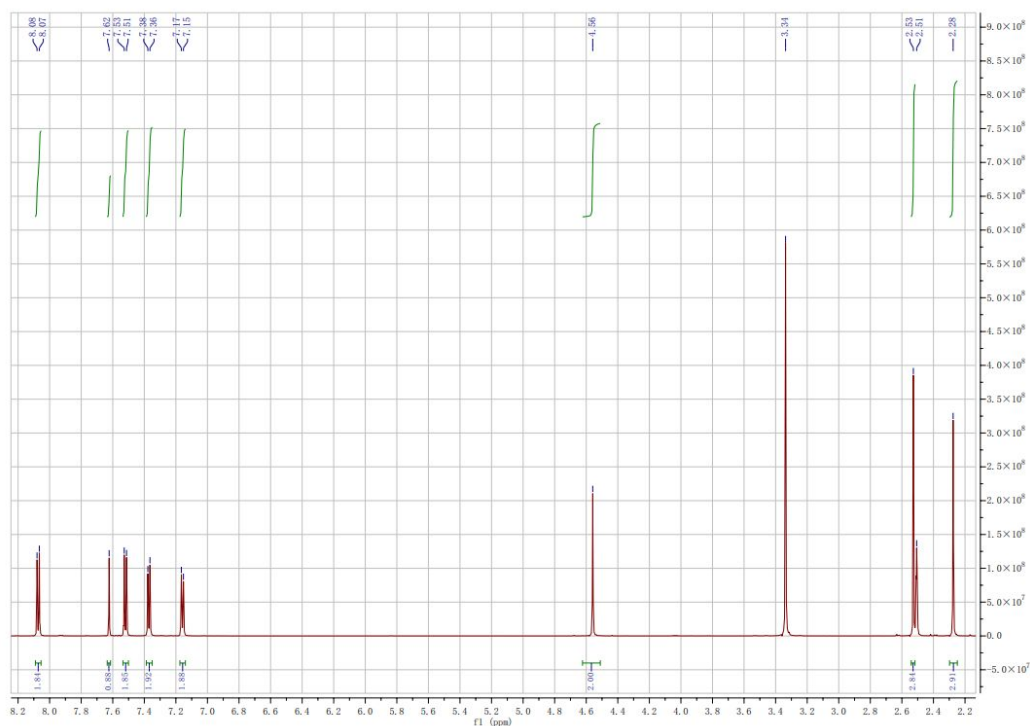

Figure S58.  $^1\text{H}$  NMR spectra of compound **60**

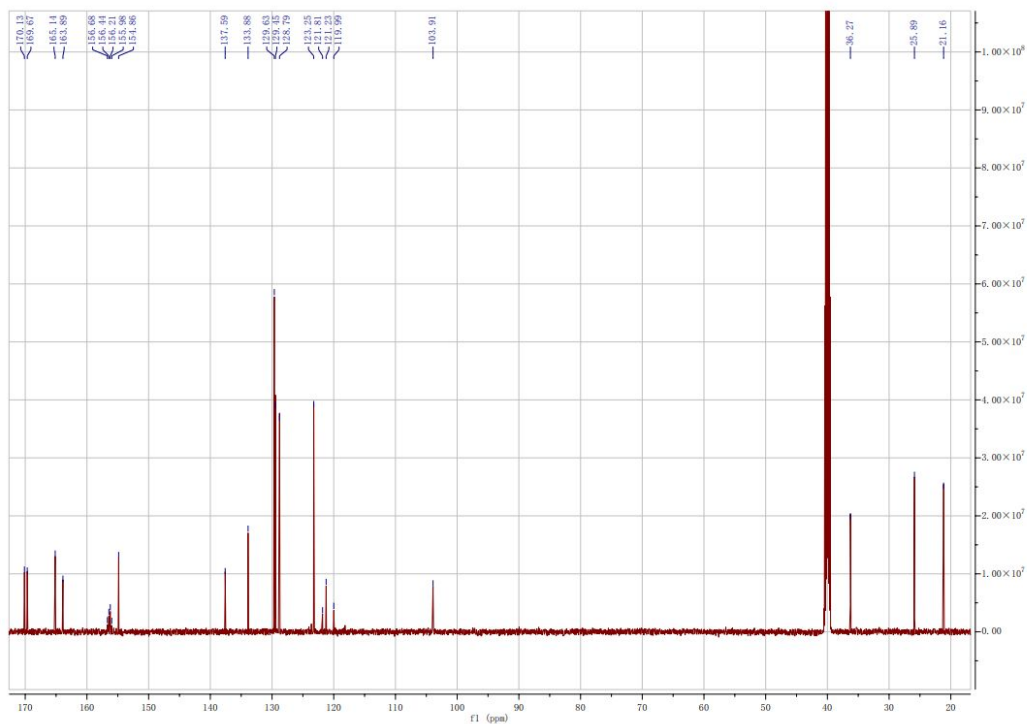

Figure S59.  $^{13}\text{C}$  NMR spectra of compound **60**

W08-23-16 #24 RT: 0.11 AV: 1 NL: 1.05E9  
T: FTMS + p ESI Full ms [100.0000-1500.0000]

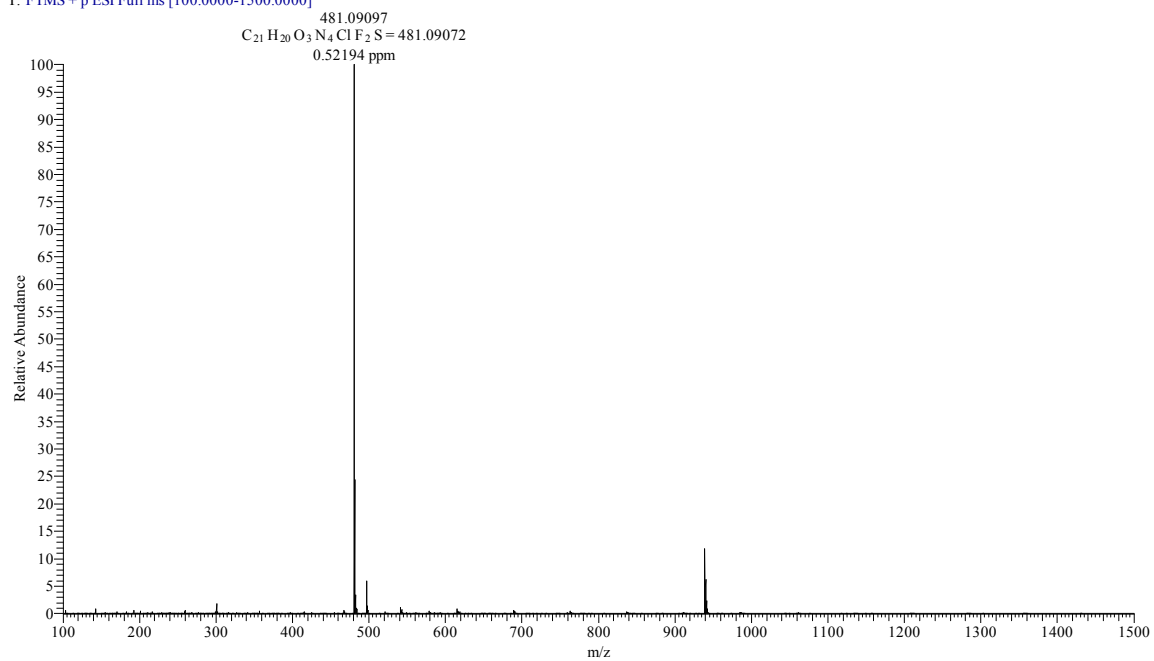

Figure S60. HMRS spectra of compound **60**

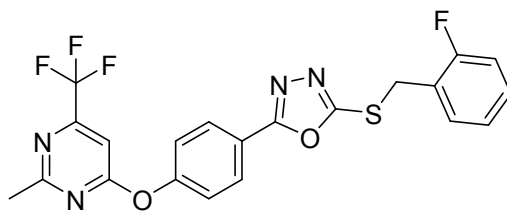

Figure S61. The structure of compound **6p**

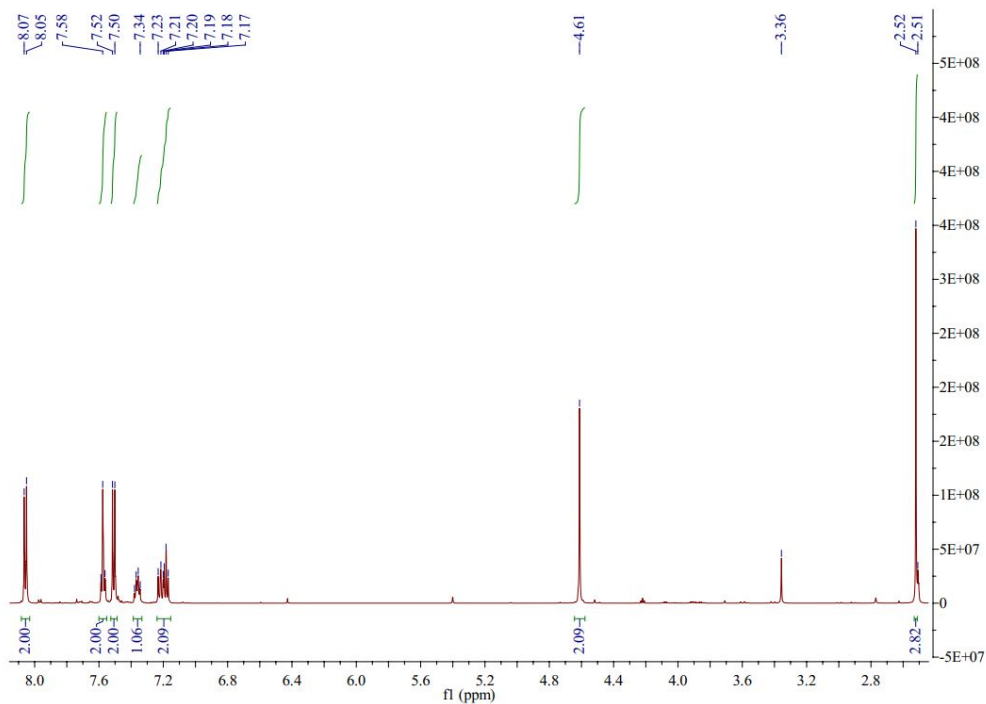

Figure S62.  $^1\text{H}$  NMR spectra of compound **6p**

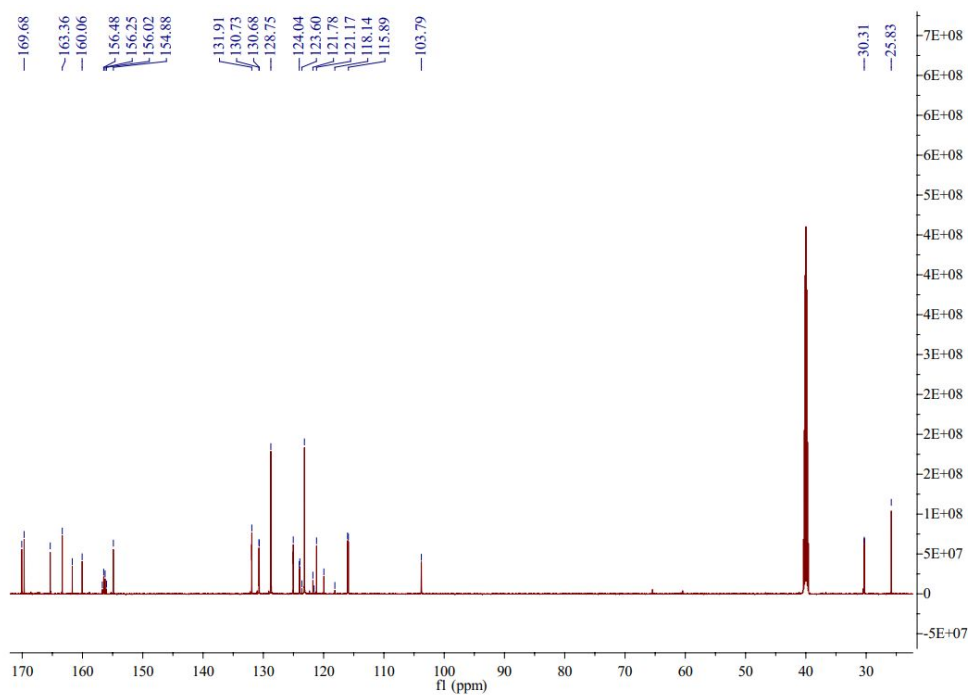

Figure S63.  $^{13}\text{C}$  NMR spectra of compound **6p**



W08-23-17 #22 RT: 0.10 AV: 1 NL: 5.05E8  
T: FTMS + p ESI Full ms [100.0000-1500.0000]

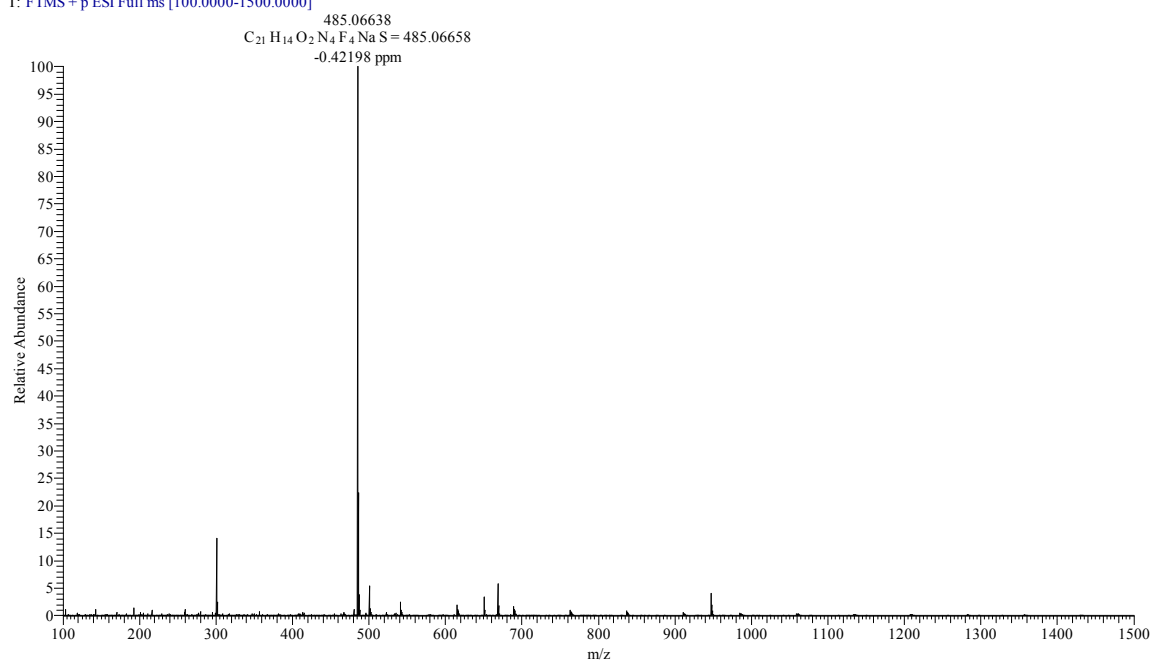

Figure S64. HMRS spectra of compound **6p**

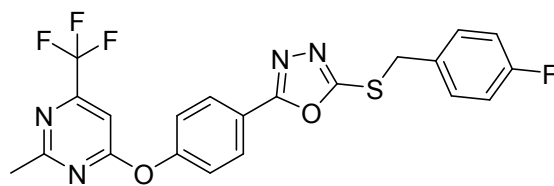

Figure S65. The structure of compound **6q**

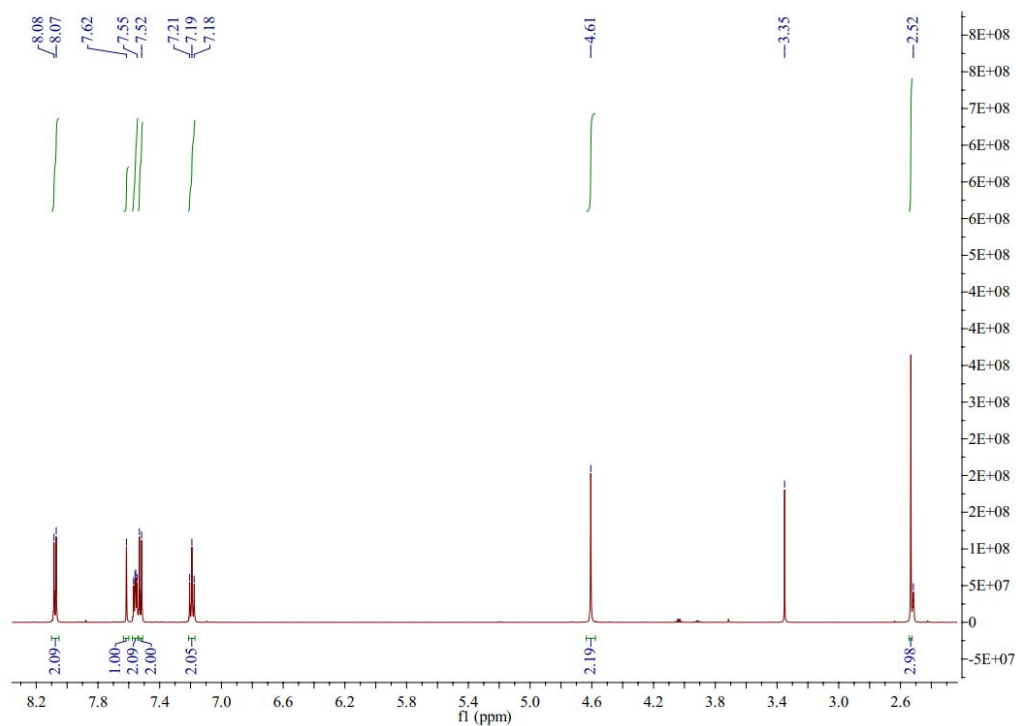

Figure S66.  $^1\text{H}$  NMR spectra of compound **6q**

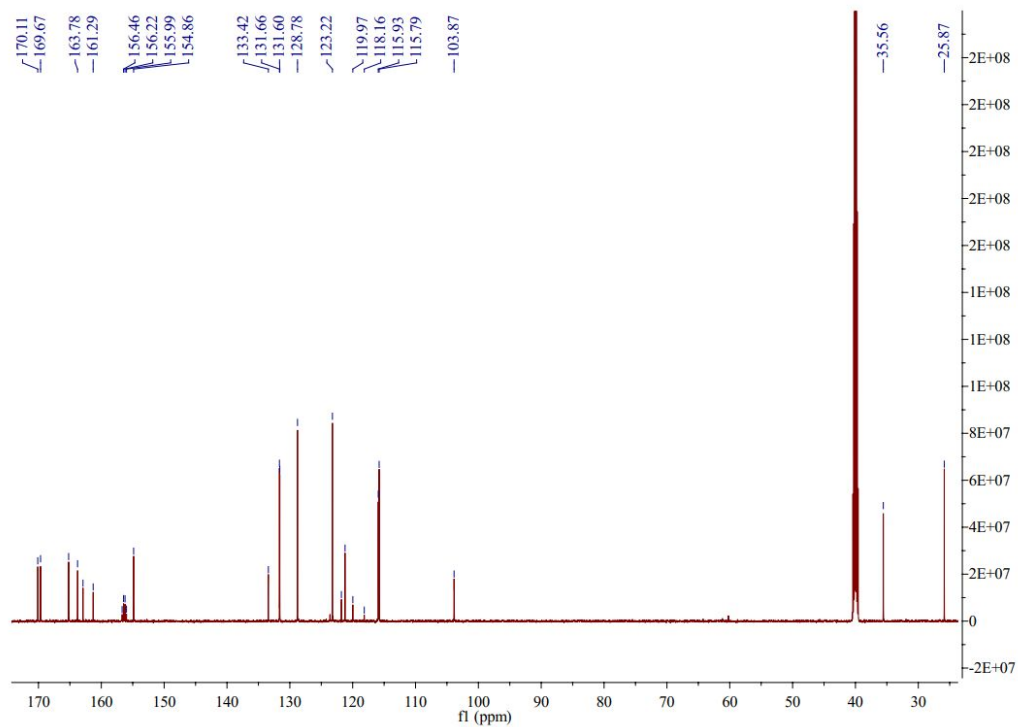

Figure S67.  $^{13}\text{C}$  NMR spectra of compound **6q**

W08-23-18 #24 RT: 0.11 AV: 1 NL: 3.25E8  
T: FTMS + p ESI Full ms [100.0000-1500.0000]

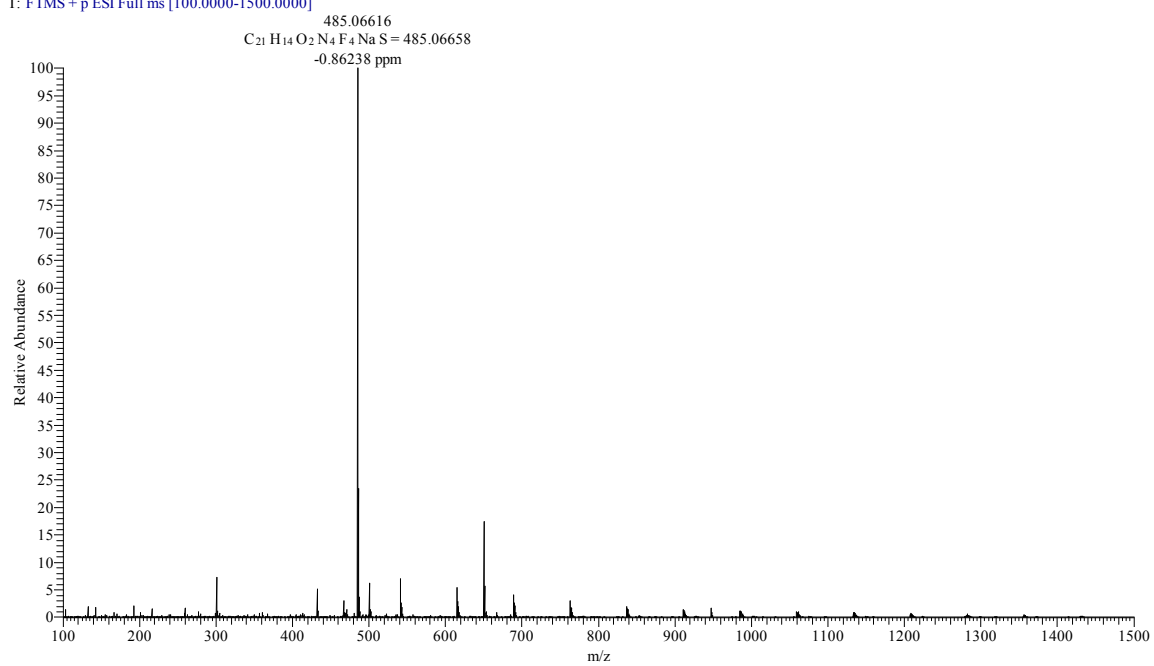

Figure S68. HMRS spectra of compound **6q**



W08-23-19 #24 RT: 0.11 AV: 1 NL: 1.73E8  
T: FTMS + p ESI Full ms [100.0000-1500.0000]

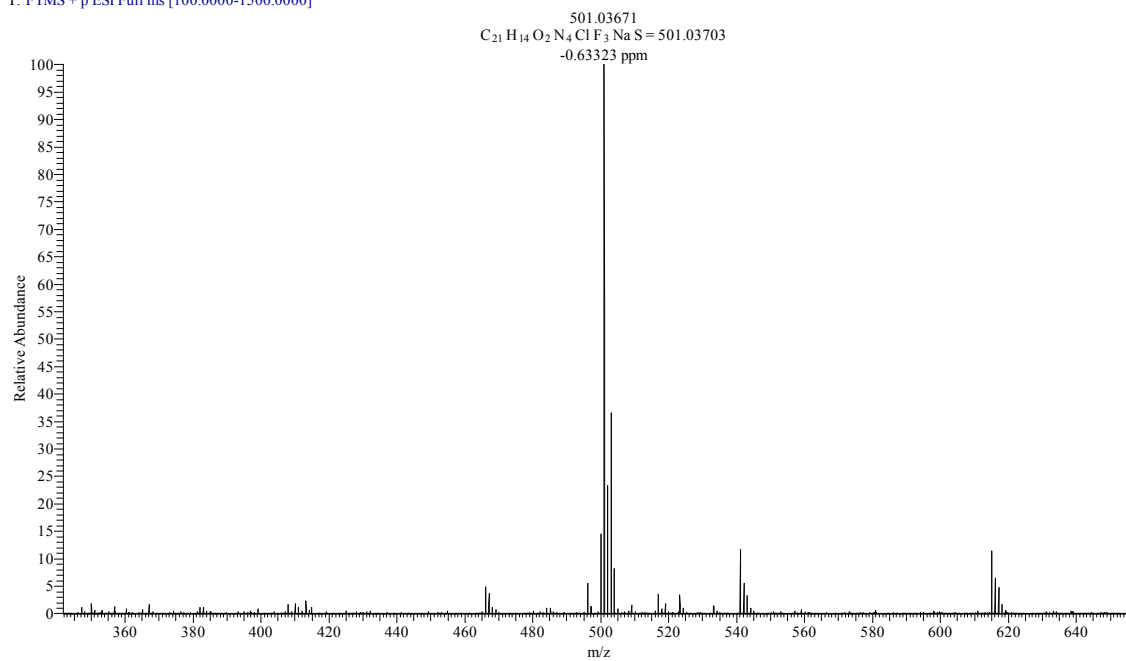

Figure S72. HMRS spectra of compound **6r**

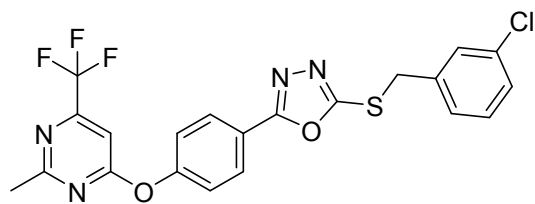

Figure S73. The structure of compound **6s**

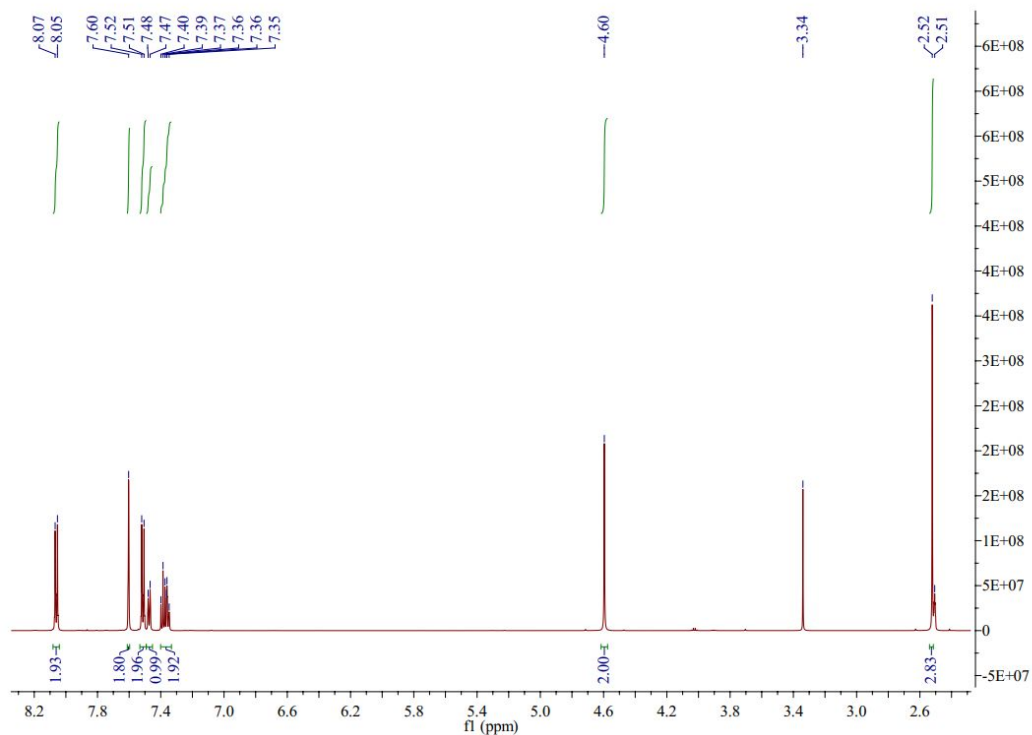

Figure S74.  $^1\text{H}$  NMR spectra of compound **6s**

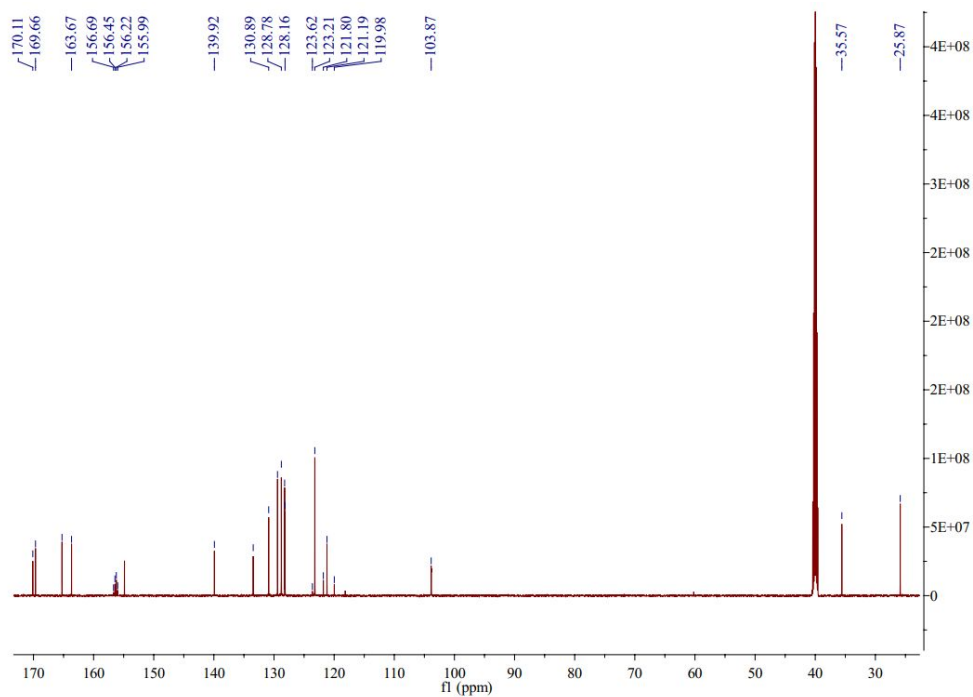

Figure S75.  $^{13}\text{C}$  NMR spectra of compound **6s**

W08-23-20 #24 RT: 0.11 AV: 1 NL: 3.23E8  
T: FTMS + p ESI Full ms [100.0000-1500.0000]

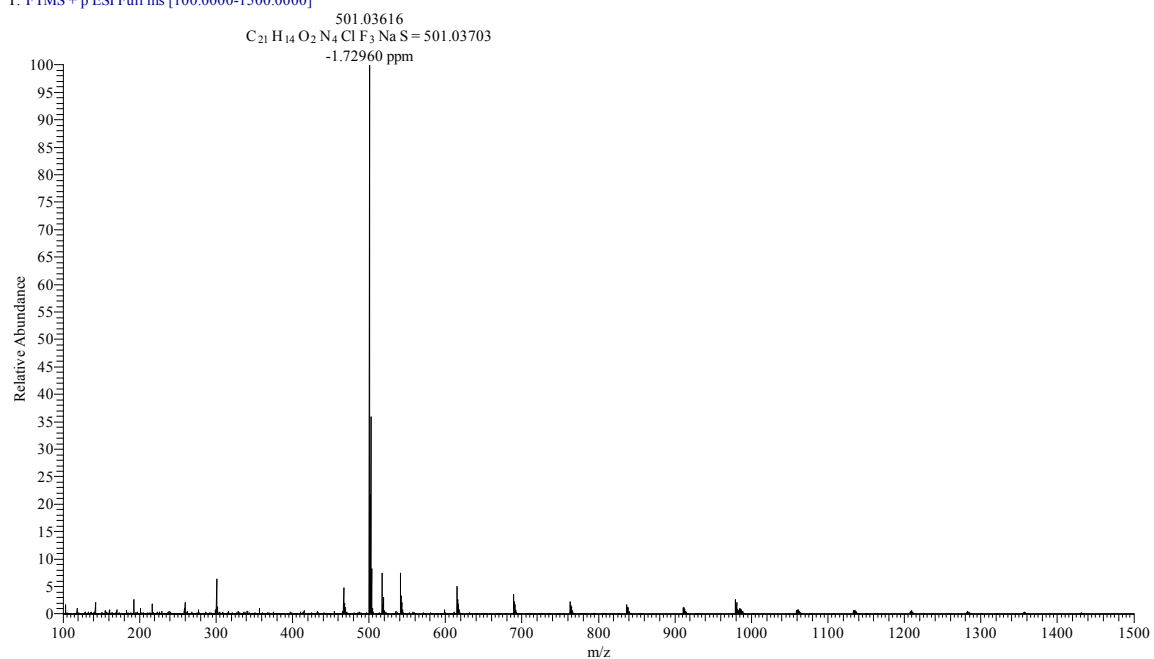

Figure S76. HMRS spectra of compound **6s**

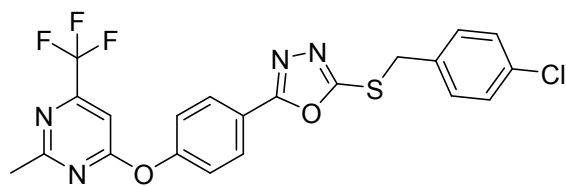

Figure S77. The structure of compound **6t**

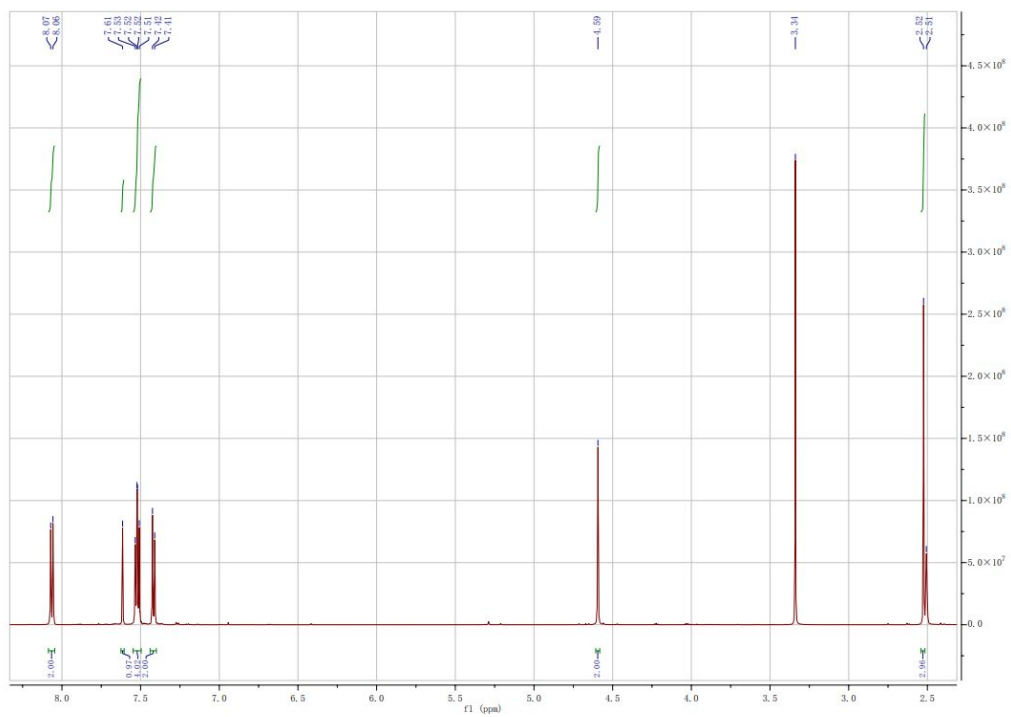

Figure S78.  $^1\text{H}$  NMR spectra of compound **6t**

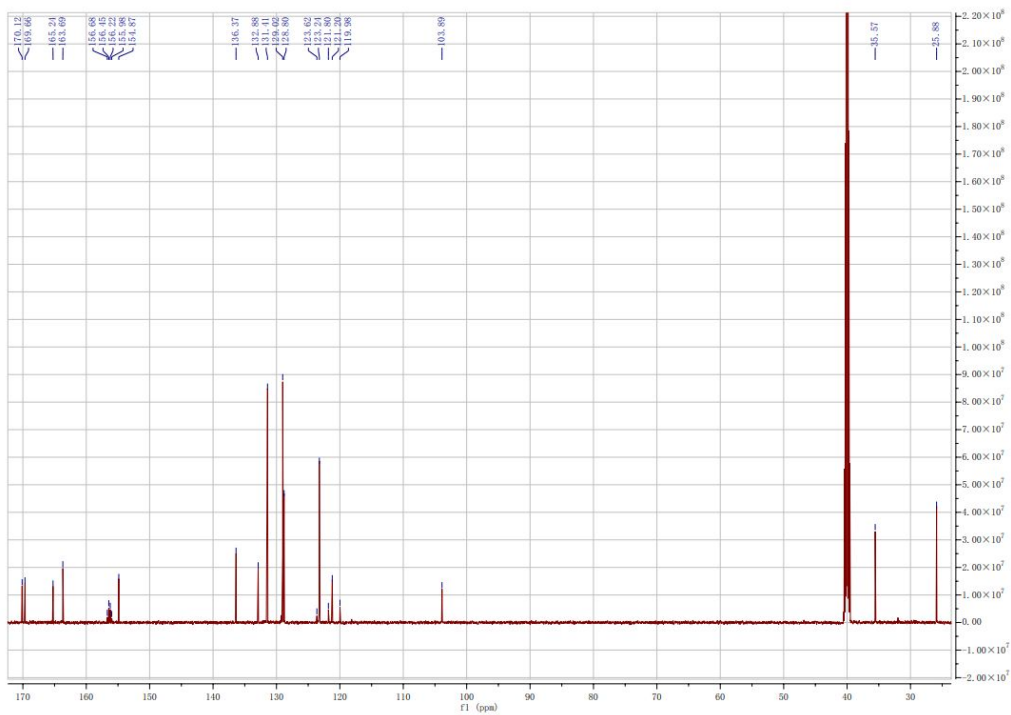

Figure S79.  $^{13}\text{C}$  NMR spectra of compound **6t**



W08-23-21 #23 RT: 0.10 AV: 1 NL: 1.64E8  
T: FTMS + p ESI Full ms [100.0000-1500.0000]

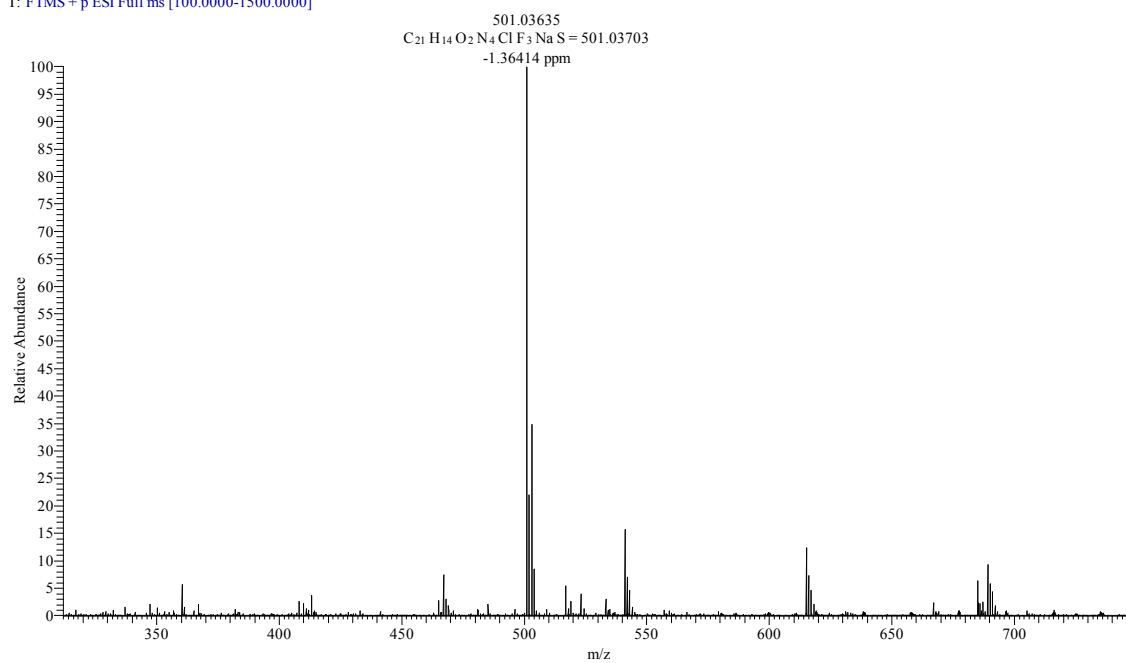

Figure S80. HMRS spectra of compound **6t**

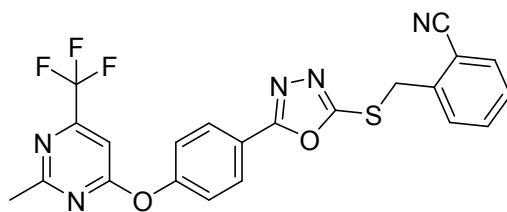

Figure S81. The structure of compound **6u**

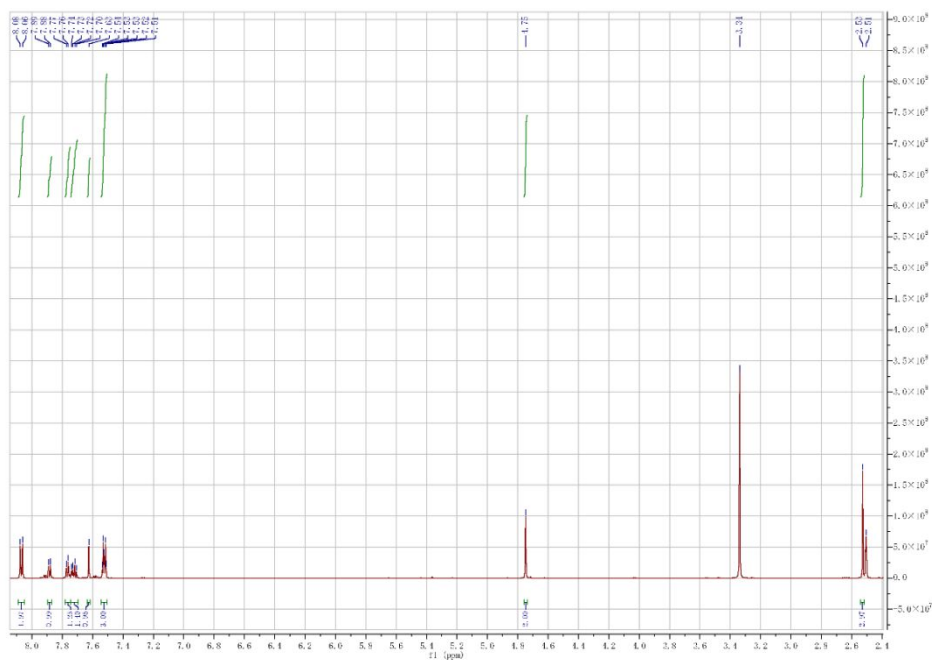

Figure S82.  $^1\text{H}$  NMR spectra of compound **6u**

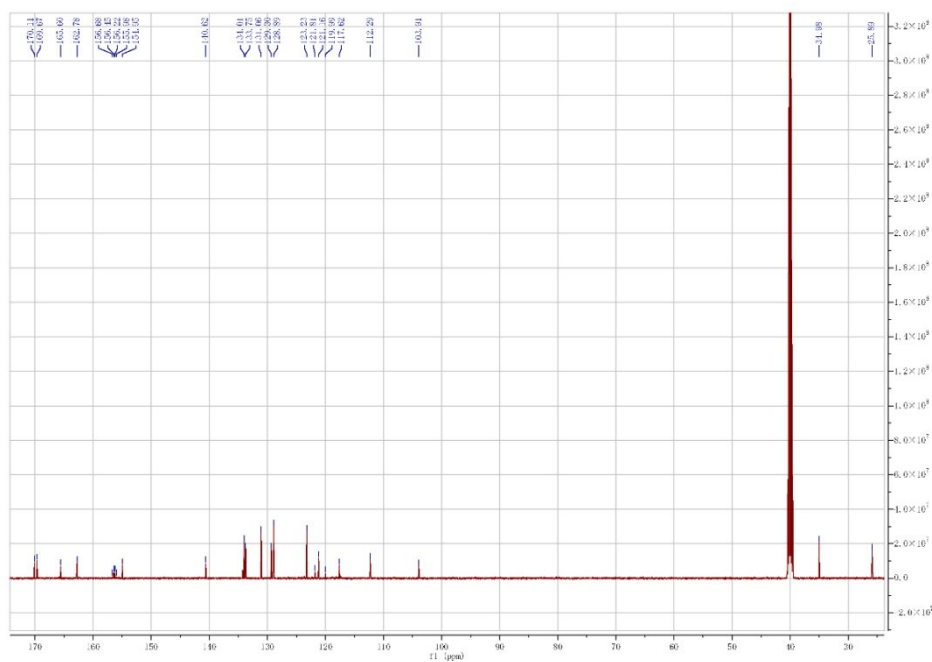

Figure S83.  $^{13}\text{C}$  NMR spectra of compound **6u**

W08-23-22 #23 RT: 0.10 AV: 1 NL: 1.27E9  
T: FTMS + p ESI Full ms [100.0000-1500.0000]

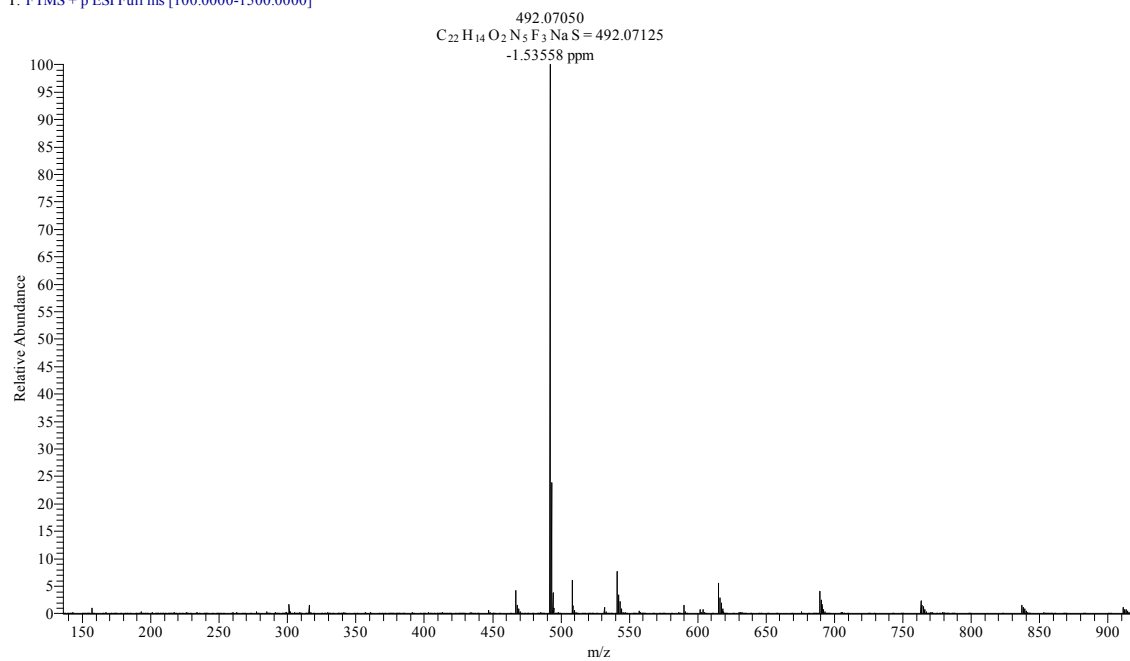

Figure S84. HMRS spectra of compound **6u**

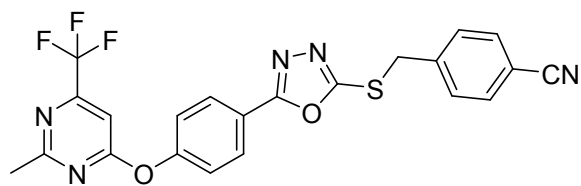

Figure S85. The structure of compound **6v**

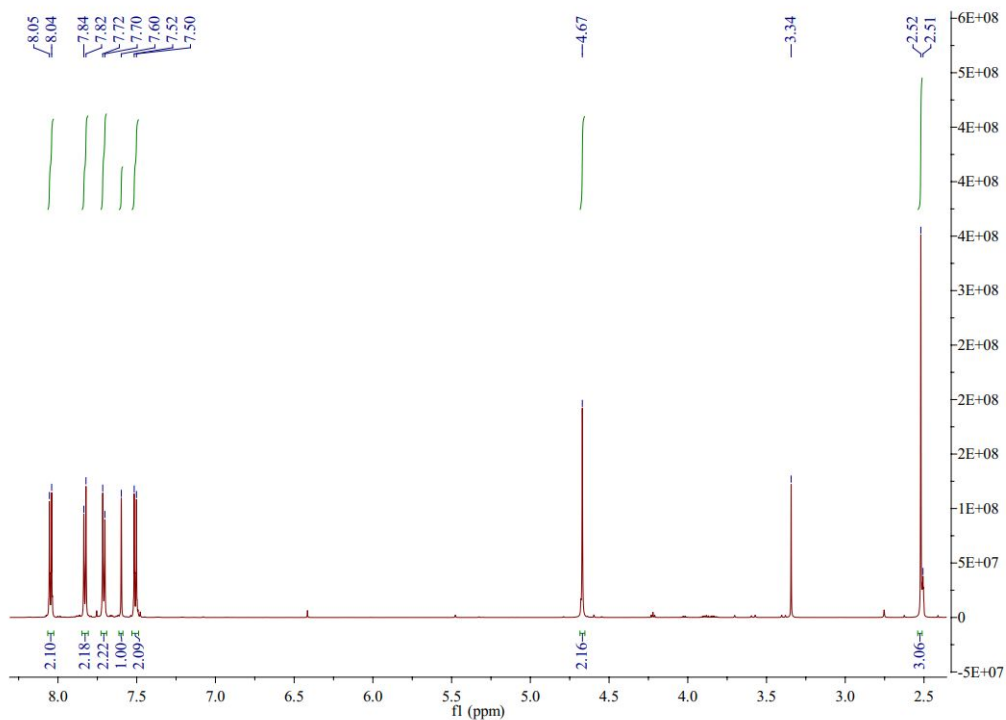

Figure S86.  $^1\text{H}$  NMR spectra of compound **6v**

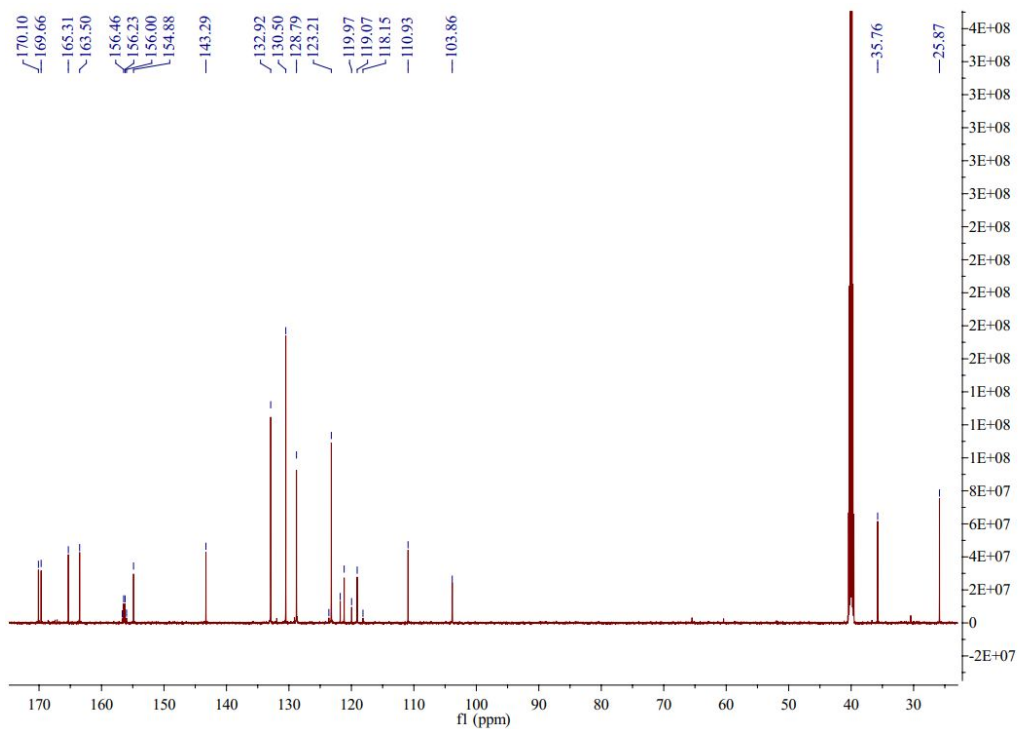

Figure S87.  $^{13}\text{C}$  NMR spectra of compound **6v**

W08-23-23 #24 RT: 0.11 AV: 1 NL: 2.31E7  
T: FTMS + p ESI Full ms [100.0000-1500.0000]

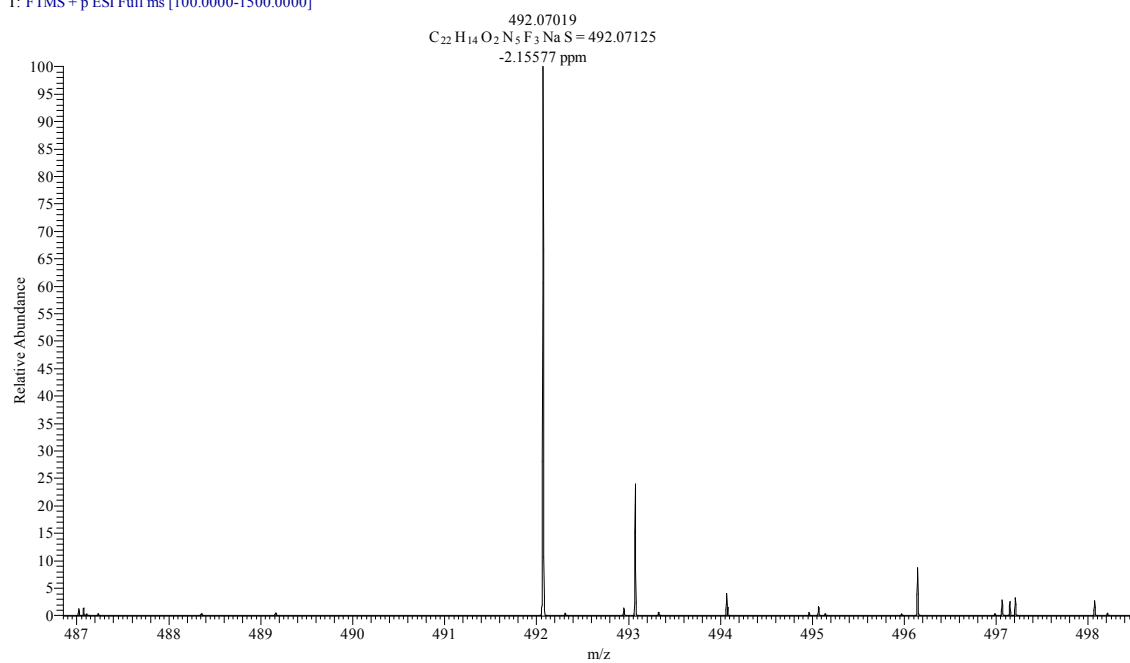

Figure S88. HMRS spectra of compound **6v**

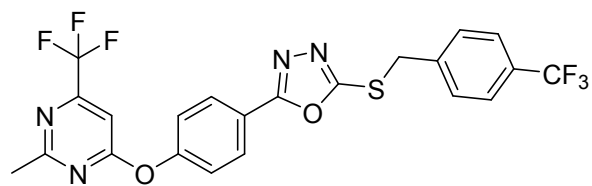

Figure S89. The structure of compound **6w**

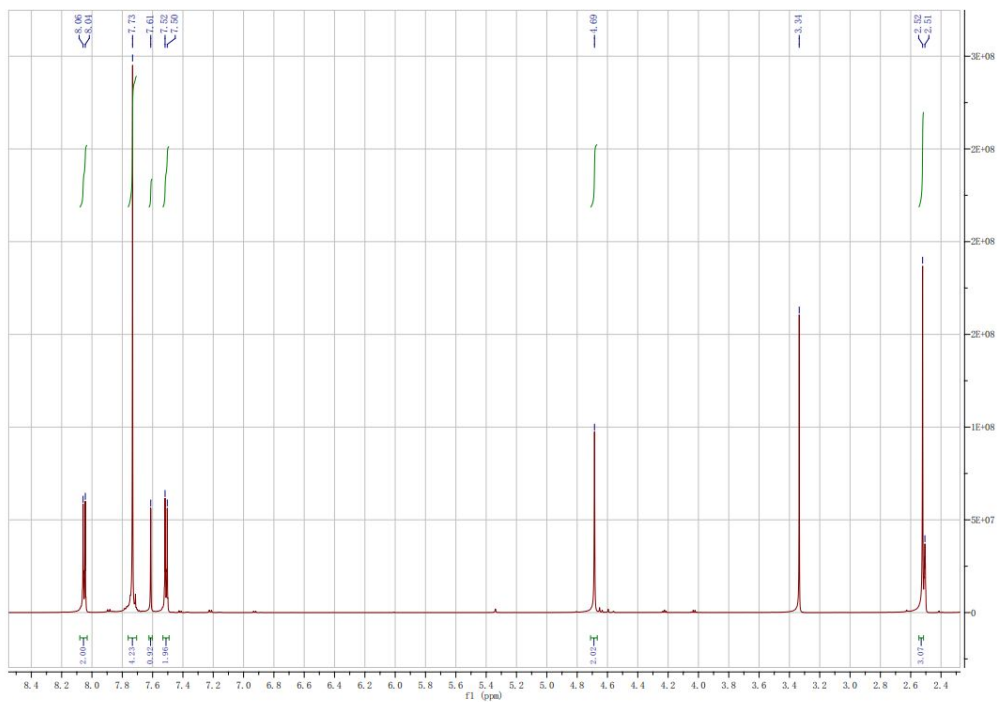

Figure S90.  $^1\text{H}$  NMR spectra of compound **6w**

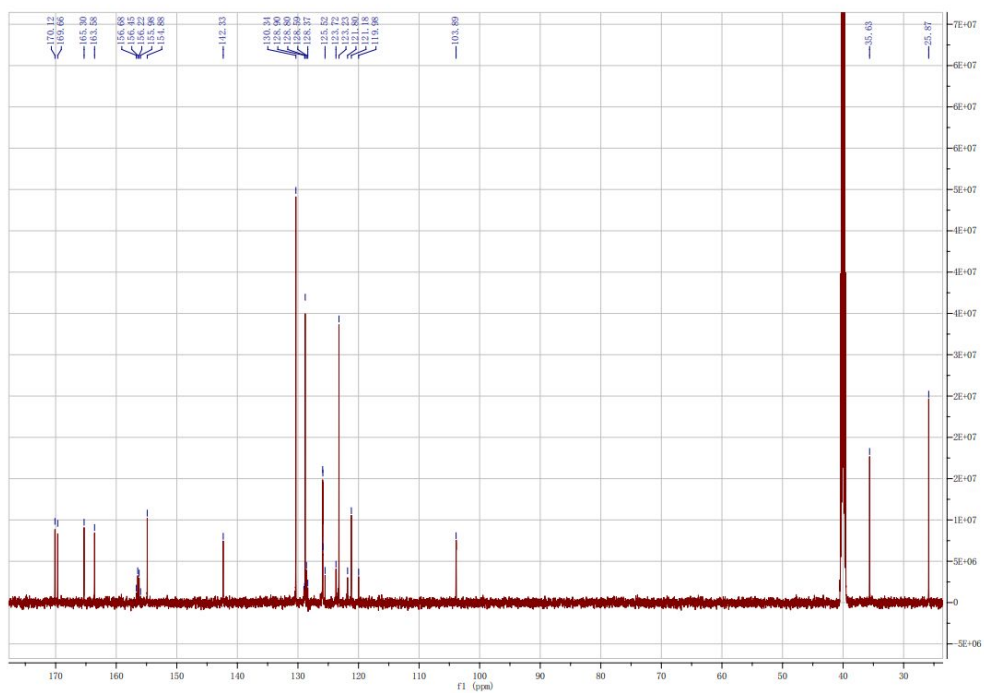

Figure S91.  $^{13}\text{C}$  NMR spectra of compound **6w**

W08-23-24 #22 RT: 0.10 AV: 1 NL: 1.40E8  
T: FTMS + p ESI Full ms [100.0000-1500.0000]

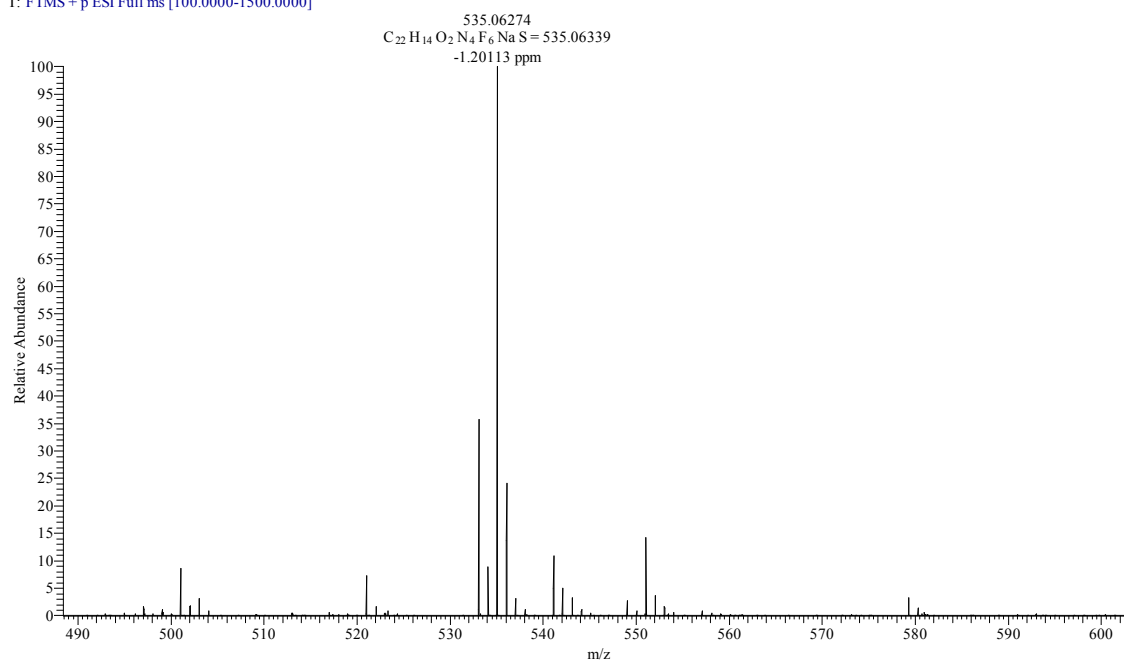

Figure S92. HMRMS spectra of compound **6w**

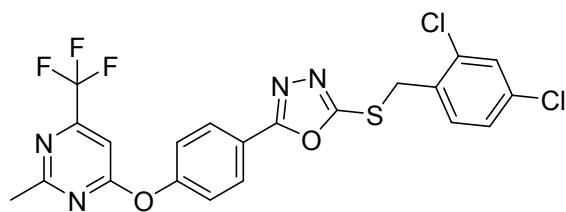

Figure S93. The structure of compound **6x**

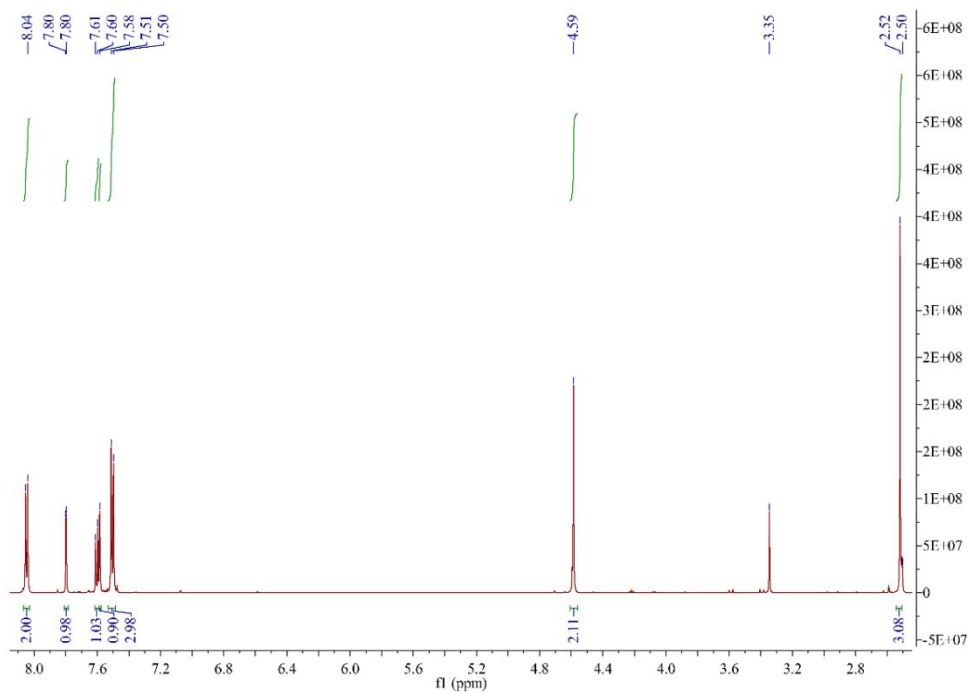

Figure S94.  $^1\text{H}$  NMR spectra of compound **6x**

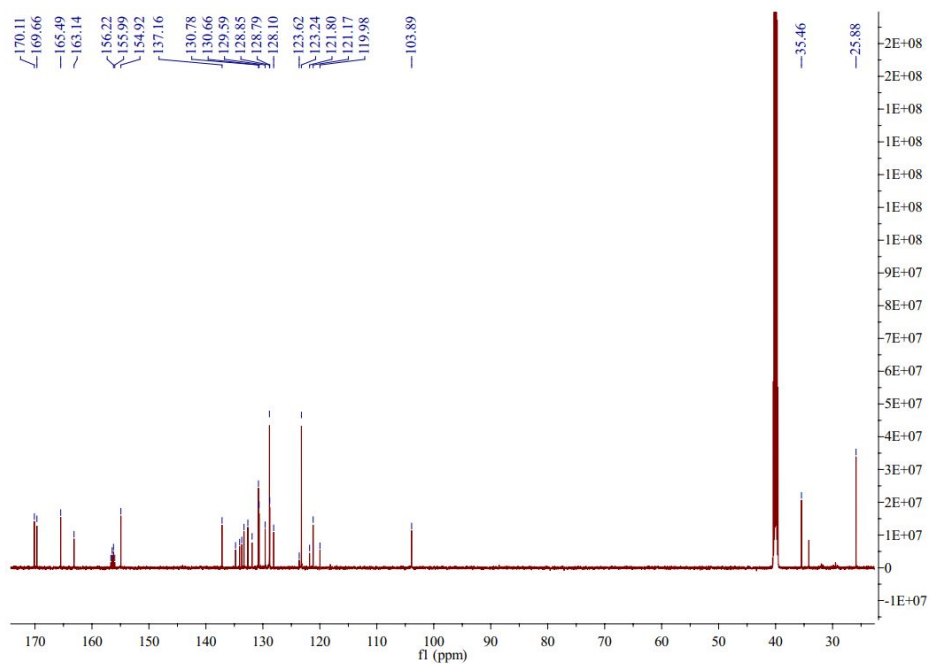

Figure S95.  $^{13}\text{C}$  NMR spectra of compound **6x**



W08-23-25 #23 RT: 0.10 AV: 1 NL: 4.38E8  
T: FTMS + p ESI Full ms [100.0000-1500.0000]

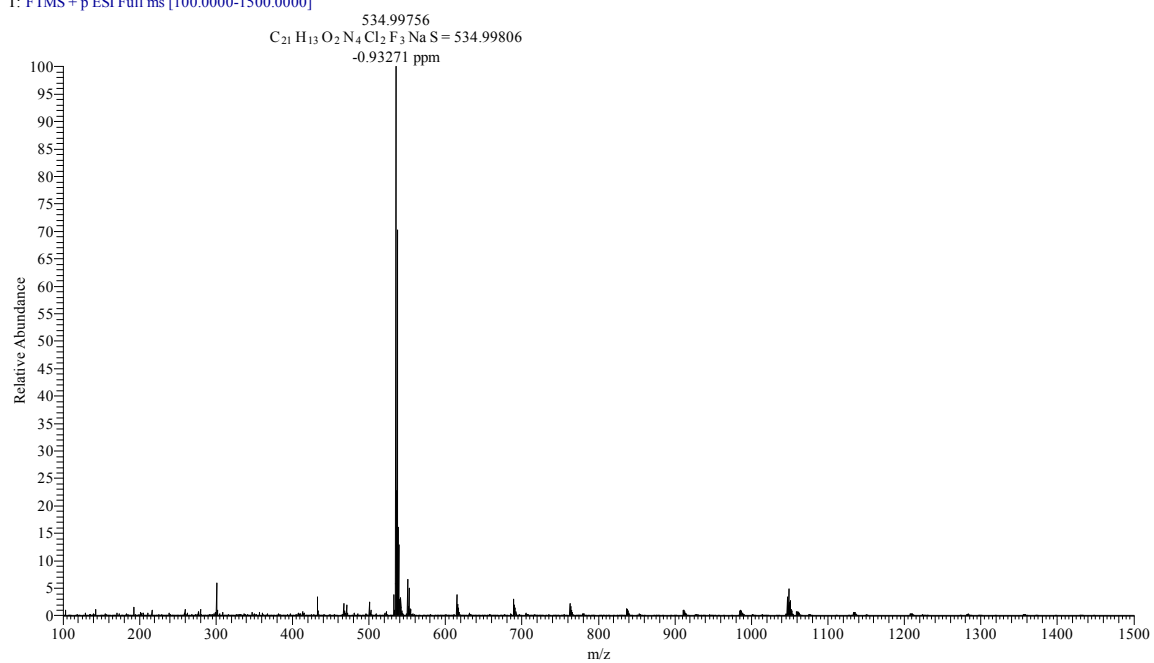

Figure S96. HMRS spectra of compound **6x**

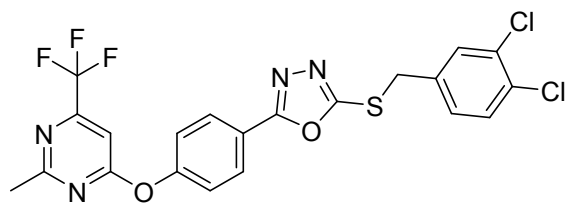

Figure S97. The structure of compound **6y**

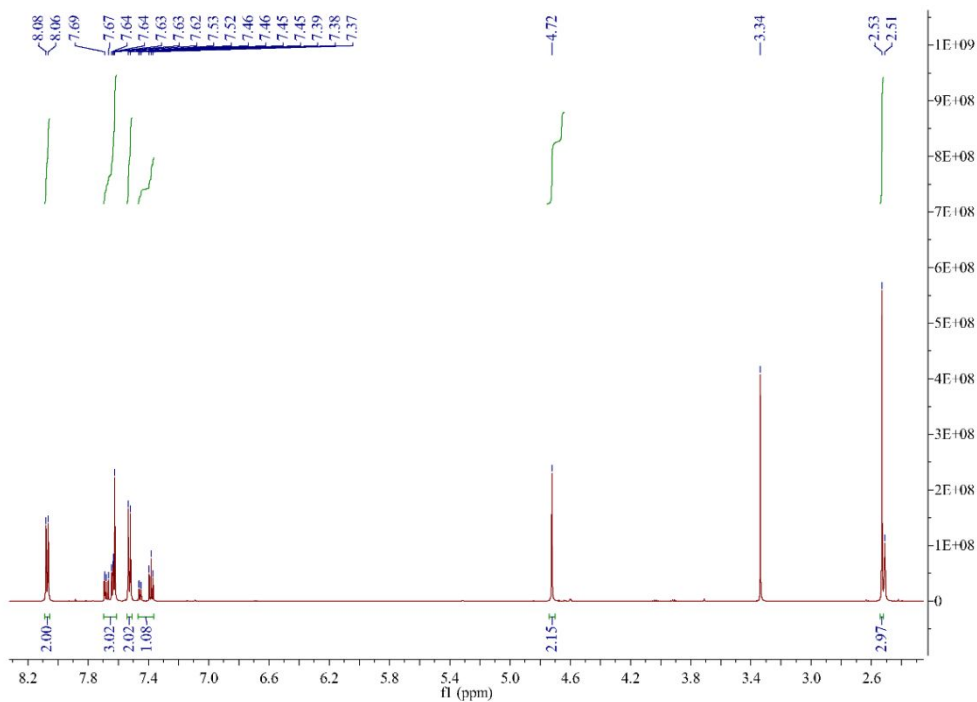

Figure S98.  $^1\text{H}$  NMR spectra of compound **6y**

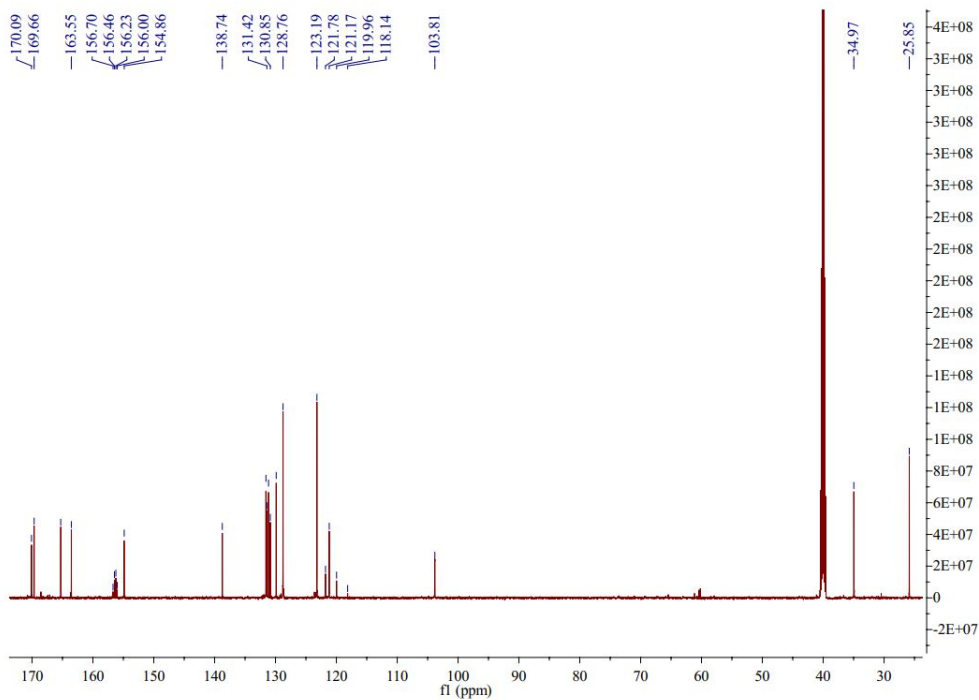

Figure S99.  $^{13}\text{C}$  NMR spectra of compound **6y**

W08-23-26 #29 RT: 0.13 AV: 1 NL: 5.10E7  
T: FTMS + p ESI Full ms [100.0000-1500.0000]

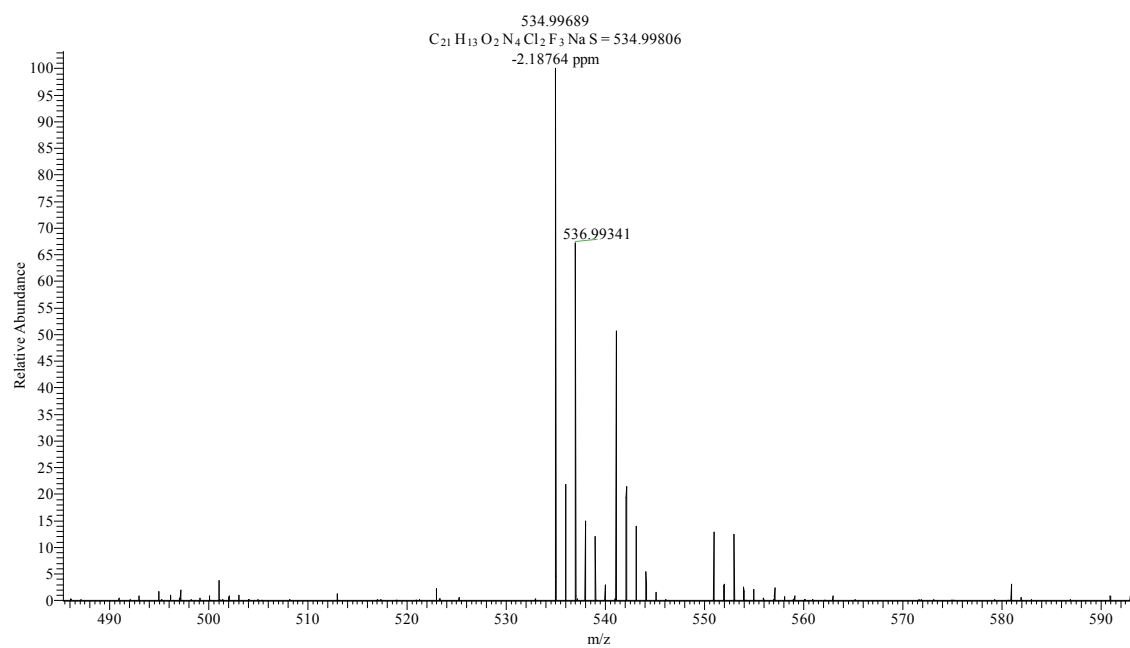

Figure S100. HMRS spectra of compound **6y**
